# Supplementary material for: Gridized polynanomer catalysis with atomically dispersed iron achieve the nearly 100% selective electroreduction of CO2 to methanol
Source: Research Square preprint supplement (doi:10.21203/rs.3.rs-5170032/v1), 2024-11-08
Supplement: Supplementary file 1 [file f4b2c442a55c990387c035ef.docx]

Supplementary information for

Gridized polynanomer catalysis with atomically dispersed iron achieve the nearly 100% selective electroreduction of CO2 to methanol

*Tonglin Yang1, Tao Wang1, Weihao Zhang1, Fu Deng1, Chunxiao Zhong1, Qian Peng1, Chao Liu1, Xin Chen1, Zheng Zhang1, Yang Li1, Yang Feng1, Xiaoyan Li1,2, Kuande Wang1, Chong Zhang1, Ying Wei1*, Fangqi Yang1*, Linghai Xie1,2,3* and Wei Huang1,2,3**

1Centre for Molecular Systems and Organic Devices, Key Laboratory for organic Electronics and Information Displays & Jiangsu Key Laboratory for Biosensors, Institute of Advanced Materials (IAM), Jiangsu National Synergetic Innovation Center for Advanced Materials (SICAM), Nanjing University of Posts & Telecommunications; Nanjing, 210023, China.

2Shaanxi Institute of Flexible Electronics (SIFE), Northwestern Polytechnical University (NPU); Xi'an, 710072, China.

3School of Flexible Electronics (SoFE) and Henan Institute of Flexible Electronics (HIFE), Henan University; Zhengzhou, 450046, China.

*Corresponding author, e-mail: iamywei@njupt.edu.cn, [iamfqyang@njupt.edu.cn,](mailto:iamhfling@njupt.edu.cn,) [iamlhxie@njupt.edu.cn](mailto:iamlhxie@njupt.edu.cn), [iamwhuang@nwpu.edu.cn](mailto:iamwhuang@nwpu.edu.cn)

**This PDF file includes:**

1. Experimental Details
2. Supplementary Figures 1-9. MALDI-TOF-MS and NMR spectra
3. Supplementary Figures 10-13. GPC, X-ray crystallography and XRD
4. Supplementary Figures 14-25. Structure and CO2RR performance
5. Supplementary Figures 26-39. NMR spectra
6. Supplementary Tables 1-4. CO2RR performance and structure
7. References

**Experimental Details**

**Materials**

All chemicals and solvents were purchased from commercial sources and used as received without further purification unless otherwise stated. Dichloromethane was dried using anhydrous sodium, while toluene and THF were dried over sodium benzophenone ketyl anion radical and distilled under a dry nitrogen atmosphere immediately prior to use. 2-bromo-9-phenyl-9*H*-fluoren-9-ol (**3a**)1 and 2,7-dibromo-9-(4-(octyloxy)phenyl)-9*H*-fluoren-9-ol (**5a**)2 were obtained according to the reported literatures.

**Synthetic procedures**

**The synthesis of 3,6-dibromo-9-ethyl-9*H*-carbazole (1a)**

3,6-dibromocarbazole (15 g, 46.2 mmol), bromoethane (5.0 g, 46.2 mmol), sodium hydroxide (1.8 g, 46.2 mmol), tetrabutylammonium bromide (1.5 g, 4.6 mmol) and acetone (308 mL) were added to a round-bottom flask. The reaction mixture was stirred at 65 oC for 12 h and monitored by TLC. After completion of the reaction, the reaction mixture was quenched with water after cooling to room temperature and extracted with dichloromethane. The combined organic layers were washed with an aqueous saturated brine solution, and dried over anhydrous Na2SO4. The organic layer was concentrated in vacuo to obtain crude product. The crude product was purified by flash column chromatography on silica gel with petroleum ether as eluent to afford the product **1a** (White flocculent powder, 14.7 g, yield: 90%). 1H NMR (400 MHz, Chloroform-*d*) δ 8.12 (d, *J* = 1.9 Hz, 2H), 7.55 (dd, *J* = 8.7, 1.9 Hz, 2H), 7.27 (s, 1H), 7.25 (s, 1H), 4.29 (q, *J* = 7.2 Hz, 2H), 1.39 (t, *J* = 7.2 Hz, 3H). 13C{1H} NMR (101 MHz, Chloroform-*d*) δ 138.7, 129.0, 123.5, 123.3, 111.9, 110.1, 37.8, 13.7.

**The synthesis of 9-ethyl-3,6-bis(4,4,5,5-tetramethyl-1,3,2-dioxaborolan-2-yl)-9*H*-carbazole** (**2a)**

To a three-necked flask was added 3,6-dibromo-9-ethyl-9*H*-carbazole **1a** (10 g, 30.7 mmol), bis(pinacolato)diboron (23.5 g, 92.3 mmol), KOAc (12.0 g, 122.8 mmol), Pd(dppf)Cl2 (1.1 g, 1.5 mmol),and 1,4-dioxane (153.5 mL) under the nitrogen atmosphere. The reaction mixture was stirred at 105 oC for 8 h and monitored by TLC. After completion of the reaction, the reaction mixture was quenched with water after cooling to room temperature and extracted with dichloromethane. The combined organic layers were washed with an aqueous saturated brine solution, and dried over anhydrous Na2SO4. The organic layer was concentrated in vacuo to obtain crude product. The crude product was purified by flash column chromatography on silica gel with 2:1 petroleum ether/dichloromethane as eluent to afford the product **2a** (White powder, 8 g, yield: 58%). 1H NMR (400 MHz, Chloroform-*d*) δ 8.68 (s, 2H), 7.92 (d, *J* = 8.2 Hz, 2H), 7.40 (d, *J* = 8.2 Hz, 2H), 4.38 (q, *J* = 7.2 Hz, 2H), 1.45 – 1.42 (m, 3H), 1.39 (s, 24H). 13C{1H} NMR (101 MHz, Chloroform-*d*) δ 142.1, 132.0, 128.1, 122.9, 107.8, 83.5, 37.6, 24.9, 13.7. MALDI-ToF-MS (m/z): calcd for C26H35B2NO4 447.28, found 447.34.

**The synthesis of 2-(9-ethyl-6-(9-hydroxy-9-phenyl-9*H*-fluoren-3-yl)-9*H*-carbazol-3-yl)-9-phenyl-9*H*-fluoren-9-ol (AOH)**

In the nitrogen atmosphere, 9-ethyl-3,6-bis(4,4,5,5-tetramethyl-1,3,2-dioxaborolan-2-yl)-9*H*-carbazole **2a** (3 g, 6.7 mmol), 2-bromo-9-phenyl-9*H*-fluoren-9-ol **3a** (6.8 g, 20.2 mmol), Pd(PPh3)4 (0.77 g, 0.67 mmol), toluene/tetrahydrofuran mixture (1:1, v/v, 20.2 mL) and K2CO3/KF aqueous solution (1:1 molar ratio, 2 M, 13.4 mL) were added under the nitrogen atmosphere. The reaction mixture was stirred at 90 oC for 2 days and monitored by TLC. After completion of the reaction, the reaction mixture was quenched with water after cooling to room temperature and extracted with dichloromethane. The combined organic layers were washed with an aqueous saturated brine solution, and dried over anhydrous Na2SO4. The organic layer was concentrated in vacuo to obtain crude product. The crude product was purified by flash column chromatography on silica gel with 6:1:1 petroleum ether/dichloromethane/ethyl acetate as eluent to afford the target product AOH(White powder, 3.4 g, yield: 72%).1H NMR (400 MHz, Chloroform-*d*) δ 8.32 (s, 2H), 7.75 (d, *J* = 1.1 Hz, 4H), 7.73 – 7.68 (m, 5H), 7.67 (d, *J* = 1.8 Hz, 1H), 7.50 (dt, *J* = 8.2, 1.5 Hz, 4H), 7.43 – 7.34 (m, 6H), 7.33 – 7.22 (m, 8H), 4.36 – 4.23 (m, 2H), 2.38 (s, 2H), 1.41 (t, *J* = 7.2 Hz, 3H). 13C{1H} NMR (101 MHz, Chloroform-*d*) δ 151.1, 150.6, 143.2, 142.4, 142.3, 139.8, 139.4, 137.9, 131.9, 131.9, 129.1, 128.2, 128.2, 128.1, 128.1, 127.2, 125.5, 125.2, 125.2, 124.7, 123.5, 123.4, 120.4, 120.0, 118.9, 118.9, 108.7, 83.7, 37.7, 13.8. MALDI-ToF-MS *m*/*z*: calcd for C52H37NO2 707.28, found 707.70.

**The synthesis of AG**

4-methyl-*N*,*N*-diphenylaniline **4a** (73.3 mg, 0.283 mmol), dichloromethane (142 mL), and BF3·Et2O (401.7 mg, 2.83 mmol) were added to a three-necked flask. AOH (200 mg, 0.283 mmol) dissolved in dichloromethane (142 mL) was dropped into the flask at room temperature, after which the reaction mixture was continuously stirred for 5 min. After completion of the reaction, the reaction mixture was quenched with water after cooling to room temperature and extracted with dichloromethane. The combined organic layers were washed with an aqueous saturated brine solution, and dried over anhydrous Na2SO4. The organic layer was concentrated in vacuo to obtain crude product. The crude product was purified by flash column chromatography on silica gel with 3:1 petroleum ether/dichloromethane/ as eluent to afford the product AG(White powder, 210 mg, yield: 80%).1H NMR (400 MHz, Chloroform-*d*) δ 8.19 (d, *J* = 1.9 Hz, 1H), 8.10 (d, *J* = 1.8 Hz, 1H), 7.88 – 7.72 (m, 8H), 7.63 (dd, *J* = 7.8, 1.6 Hz, 1H), 7.60 – 7.55 (m, 2H), 7.53 – 7.45 (m, 3H), 7.44 – 7.36 (m, 4H), 7.35 – 7.28 (m, 4H), 7.22 – 7.03 (m, 17H), 7.00 (d, *J* = 8.6 Hz, 1H), 4.50 – 4.35 (m, 2H), 2.30 (d, *J* = 3.5 Hz, 3H), 1.53 – 1.46 (m, 3H). 13C{1H} NMR (101 MHz, Chloroform-*d*) δ 152.1, 151.7, 151.0, 150.9, 147.3, 147.2, 147.0, 146.8, 145.1, 145.0, 142.1, 142.0, 140.2, 140.2, 140.0, 139.8, 139.8, 138.5, 138.4, 133.3, 133.1, 131.5, 129.7, 129.6, 129.6, 129.4, 128.1, 128.1, 127.9, 127.6, 127.5, 127.4, 127.4, 127.4, 126.7, 126.4, 126.3, 125.8, 125.6, 125.2, 124.9, 124.7, 124.6, 123.5, 123.4, 123.0, 122.7, 122.7, 120.3, 120.3, 120.2, 120.1, 119.9, 119.8, 108.8, 108.8, 64.9, 37.9, 20.7, 13.9. MALDI-ToF-MS (m/z): calcd for C71H50N2 930.40, found 930.94.

**The synthesis of FeAG**

AG (100.0 mg, 0.108 mmol) dissolved in dichloromethane (50 mL) was added to a 150 mL flask and then FeCl3 (35.0 mg, 0.216 mmol) dissolved in EtOH (25 mL) was added to the flask. The reaction mixture was stirred at room temperature for 12 h. After completion of the reaction, the solvent was removed under vacuum. Subsequently, the remaining solid was washed with deionized water and centrifuged to remove unreacted FeCl3, resulting in crude product FeAG. The crude product FeAG was not subjected to further separation and purification.

**The synthesis of DBrAOH**

In a three-necked flask, 9-ethyl-3,6-bis(4,4,5,5-tetramethyl-1,3,2-dioxaborolan-2-yl)-9*H*-carbazole **2a** (3 g, 6.7 mmol), 2,7-dibromo-9-(4-(octyloxy)phenyl)-9*H*-fluoren-9-ol **5a** (11 g, 20.2 mmol), Pd(PPh3)4 (0.77 g, 0.67 mmol), toluene/tetrahydrofuran mixture (1:1, v/v, 20.2 mL) and K2CO3/KF aqueous solution (1:1 molar ratio, 2 M, 13.4 mL) were added under the nitrogen atmosphere. The reaction mixture was stirred at 90 oC for 2 days and monitored by TLC. After completion of the reaction, the reaction mixture was quenched with water after cooling to room temperature and extracted with dichloromethane. The combined organic layers were washed with an aqueous saturated brine solution, and dried over anhydrous Na2SO4. The organic layer was concentrated in vacuo to obtain crude product. The crude product was purified by flash column chromatography on silica gel with 8:1:1 petroleum ether/dichloromethane/ethyl acetate as eluent to afford the product DBrAOH (Yellow powder, 600 mg, yield: 8%). 1H NMR (400 MHz, Chloroform-*d*) δ 8.29 (d, *J* = 1.8 Hz, 2H), 7.80 – 7.60 (m, 8H), 7.54 – 7.43 (m, 6H), 7.41 – 7.29 (m, 6H), 6.81 (d, *J* = 8.5 Hz, 4H), 4.40 – 4.24 (m, 2H), 3.89 (t, *J* = 6.6 Hz, 4H), 2.58 (s, 2H), 1.79 – 1.67 (m, *J* = 6.8 Hz, 4H), 1.45 – 1.18 (m, 23H), 0.87 (t, *J* = 6.5 Hz, 6H). 13C{1H} NMR (101 MHz, Chloroform-*d*) δ 158.6, 152.8, 150.9, 142.7, 142.6, 139.9, 138.1, 136.8, 134.2, 132.0, 131.8, 131.7, 128.2, 128.1, 128.1, 126.6, 125.2, 125.2, 123.5, 123.4, 123.4, 121.7, 121.3, 120.5, 118.9, 118.9, 114.3, 108.8, 83.3, 67.9, 37.7, 31.8, 29.3, 29.2, 29.2, 26.0, 22.6, 14.1, 13.8. MALDI-ToF-MS (m/z): calcd for C68H67Br2NO4 1121.34, found 1121.69.

**The synthesis of DBrAG**

4-methyl-*N*,*N*-diphenylaniline **4a** (69.4 mg, 0.268 mmol), dichloromethane (134 mL), and BF3·Et2O (401.7 mg, 2.83 mmol) were added to a three-necked flask. DBrAOH (300 mg, 0.268 mmol) dissolved in dichloromethane (134 mL) was dropped into the flask at room temperature, after which the reaction mixture was continuously stirred for 5 min. After completion of the reaction, the reaction mixture was quenched with water after cooling to room temperature and extracted with dichloromethane. The combined organic layers were washed with an aqueous saturated brine solution, and dried over anhydrous Na2SO4. The organic layer was concentrated in vacuo to obtain crude product. The crude product was purified by flash column chromatography on silica gel with 3:1 petroleum ether/dichloromethane as eluent to afford the product DBrAG(White powder, 89 mg, yield: 25%). 1H NMR (400 MHz, Chloroform-*d*) δ 8.15 (s, 2H), 7.80 (d, *J* = 7.9 Hz, 2H), 7.78 – 7.71 (m, 4H), 7.66 (t, *J* = 8.3 Hz, 3H), 7.64 – 7.57 (m, 3H), 7.56 – 7.49 (m, 2H), 7.47 (d, *J* = 8.4 Hz, 2H), 7.31 (d, *J* = 8.6 Hz, 4H), 7.16 – 7.07 (m, 6H), 7.05 (d, *J* = 9.0 Hz, 6H), 6.68 (d, *J* = 9.0 Hz, 4H), 4.41 (q, *J* = 7.2 Hz, 2H), 3.81 (t, *J* = 6.6 Hz, 4H), 2.34 (s, 3H), 1.73 – 1.61 (m, 4H), 1.48 (t, *J* = 7.1 Hz, 3H), 1.38 – 1.18 (m, 20H), 0.84 (t, *J* = 6.7 Hz, 6H). 13C{1H} NMR (101 MHz, Chloroform-*d*) δ 157.9, 153.3, 152.2, 147.3, 145.0, 142.4, 139.8, 139.3, 139.1, 137.7, 137.2, 132.9, 131.8, 130.7, 129.8, 129.5, 129.3, 128.9, 126.7, 125.6, 124.9, 124.7, 123.4, 123.2, 121.5, 121.1, 120.3, 119.8, 114.1, 108.8, 67.8, 64.3, 37.9, 31.7, 29.3, 29.2, 26.0, 22.6, 20.8, 14.0, 13.9. MALDI-ToF-MS (m/z): calcd for C87H80Br2N2O2 1344.46, found 1344.76.

**The synthesis of PAG**

In the nitrogen atmosphere, DBrAG (295.8 mg, 0.22 mmol), Ni(COD)2 (550 mg, 2.0 mmol), 1,5-cyclooctadiene (119 mg, 1.1 mmol), and bipyridyl (156.2 mg, 1.0 mmol), DMF (as a cosolvent, 0.5 mL), and toluene (as the other part of cosolvent, 7 mL) are added to a Schlenk tube. The reaction mixture was stirred at 85 oC for 5 days. Subsequently, bromobenzene (1 ml) was added to the solution for terminating the reaction, and the reaction was continued for 1 day. After completion of the reaction, the reaction mixture was quenched with THF and hytrazine hydrate after cooling to room temperature. The precipitate was separated by filtration. The crude product was further purified by the alumina (Al2O3) column chromatography with THF as eluent and Soxhlet extraction with acetone/THF mixture (9:1, v/v) to afford the product PAG (White powder, 144 mg, yield: 48%). 1H NMR (400 MHz, Chloroform-*d*) δ 8.44 – 8.00 (2H), 7.94 – 7.72 (8H), 7.63 (5H), 7.49 (3H), 7.42 – 7.28 (4H), 7.18 – 6.88 (12H), 6.69 (4H), 4.43 (2H), 3.90 – 3.70 (4H), 2.25 (3H), 1.75 – 1.60 (4H), 1.51 (3H), 1.25 (20H), 0.87 – 0.78 (6H). The above integration only represented the integration ratio. 13C{1H} NMR (101 MHz, Chloroform-*d*) 157.7, 152.8, 152.4, 147.2, 144.4, 141.9, 141.0, 139.8, 139.2, 138.5, 137.9, 133.1, 129.7, 129.3, 129.0, 127.4, 126.7, 125.6, 124.8, 123.4, 120.3, 119.9, 114.0, 108.8, 67.7, 64.3, 37.9, 31.7, 29.3, 29.3, 29.2, 26.0, 22.6, 20.8, 14.1, 14.0.

**The synthesis of FePAG**

PAG (100.0 mg) in dichloromethane (50 mL) was added to a 150 mL flask and then FeCl3 (27.3 mg) in EtOH (25 mL) was added to the flask. The reaction mixture was stirred at room temperature for 12 h. After completion of the reaction, the solvent was removed under vacuum. Subsequently, the remaining solid was washed with deionized water and centrifuged to remove unreacted FeCl3, resulting into crude product FePAG. The crude product FePAG cannot be further separation and purification.

**Supplementary Table 1 |** Comparison of catalytic performances of molecular catalysts for CO2 electroreduction to CH3OH in an H-cell.

| Catalyst | Support | Electrolyte | FECH3OH (%) | Stability (h) | CH3OH selectivity (%) | Reference |
| --- | --- | --- | --- | --- | --- | --- |
| FeAG | CP | 0.5 M KHCO3 | 49.4 | 20 | 96.8 | This work |
| FePAG | CP | 0.5 M KHCO3 | 60.5 | 100 | 98.3 | This work |
| CoPc | CNT | 0.1 M KHCO3 | 44 | 4 | 62 | (*3*) |
| CoTAPc | CNT | 0.1 M KHCO3 | 32 | 12 | 48 | (*3*) |
| CoPc | CNT | 0.5 M KHCO3 | 19.5 | - | 7.5 | (*4*) |
| Co corrole | CP | 0.1M NaClO4 | 59 | - | 73 | (*5*) |
| CoPc | SWCNT | 0.5 M KHCO3 | 53.4 | 10 | ~ 68 | (*6*) |
| iminium-CONs | CP | 0.5 M KHCO3 | 43.4 | - | ~ 55 | (*7*) |

**
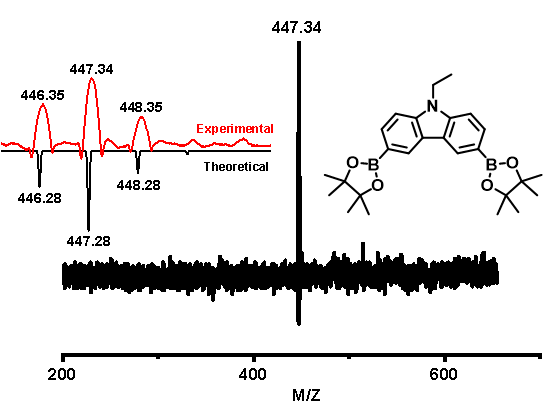
**

**Supplementary Fig. 1** **|** MALDI-TOF-MS of **2a**.


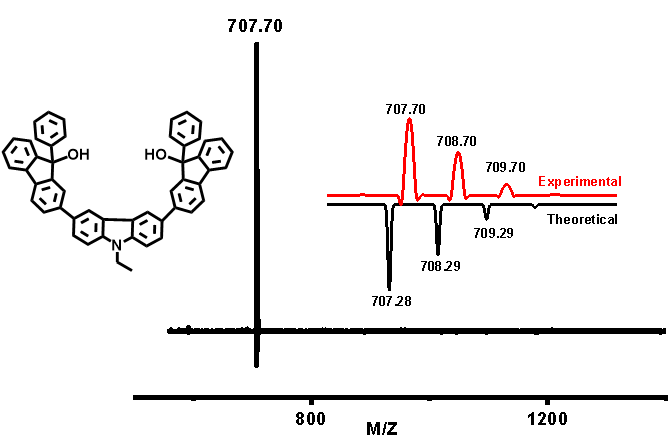


**Supplementary Fig. 2 |** MALDI-TOF-MS of AOH.


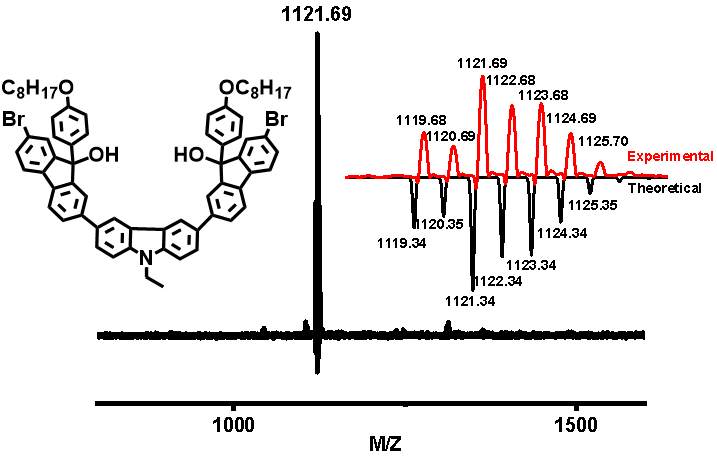


**Supplementary Fig.** **3 |** MALDI-TOF-MS of DBrAOH.


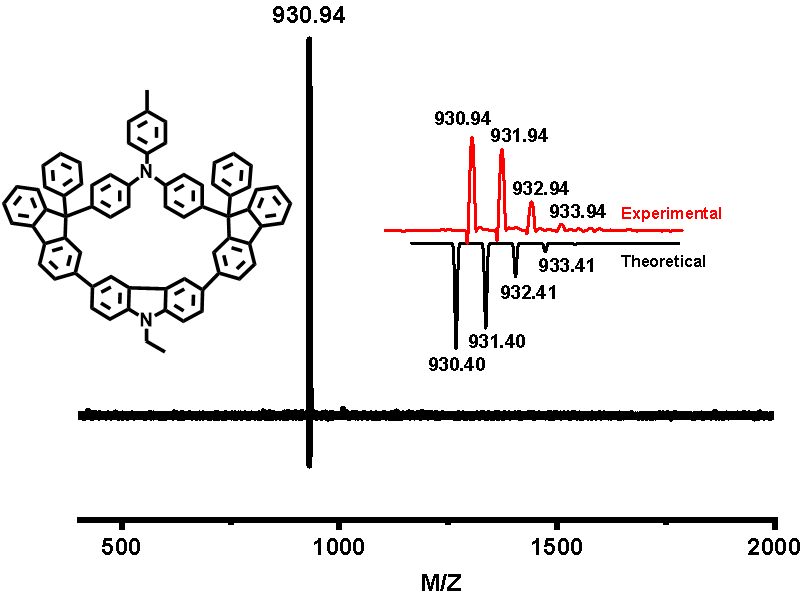


**Supplementary Fig.** **4 |** MALDI-TOF-MS of AG.


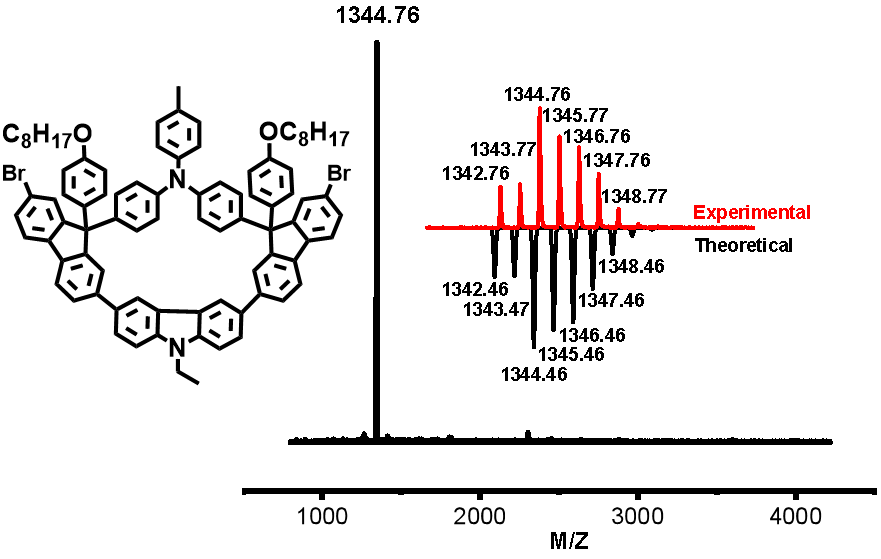


**Supplementary Fig.** **5 |** MALDI-TOF-MS of DBrAG.


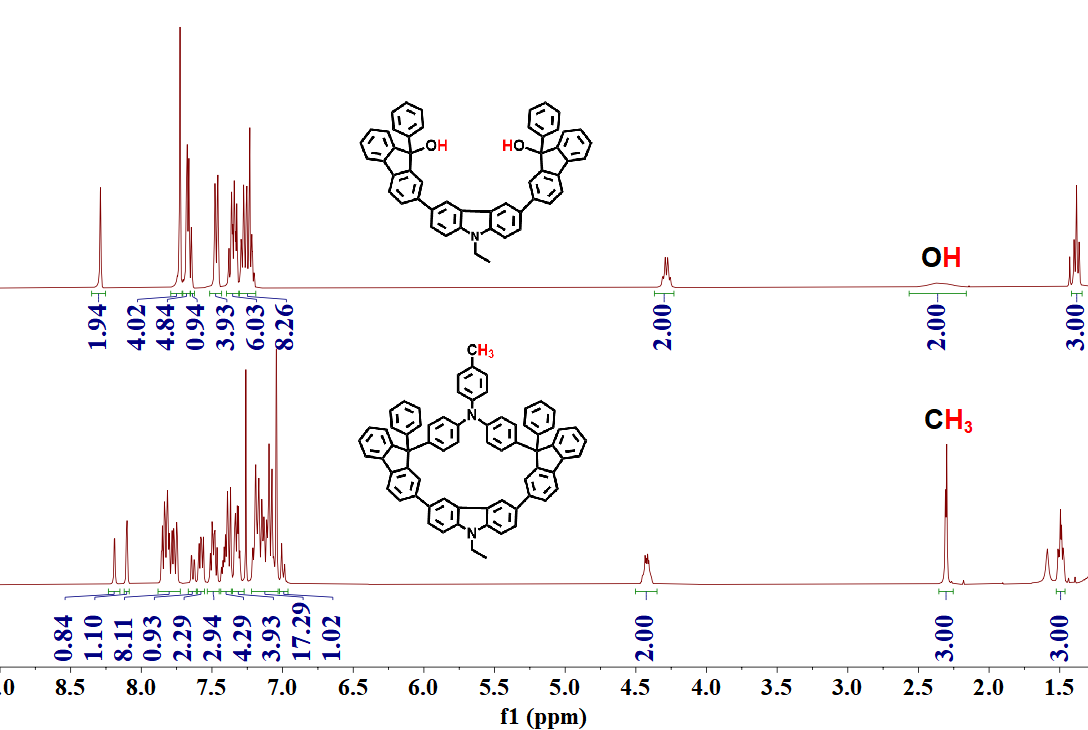


**Supplementary Fig. 6 |** 1H NMR spectra of AOH and AG. The proton signal at 2.38 ppm belonging to the protons of hydroxyl groups at the 9-position of AOH was not observed in AG. Furthermore, the detected peak at 2.3 ppm, corresponding to the protons of methyl group of 4-methyl-*N*,*N*-diphenylaniline, was observed in AG. These results indicated the successful synthesis of AG.


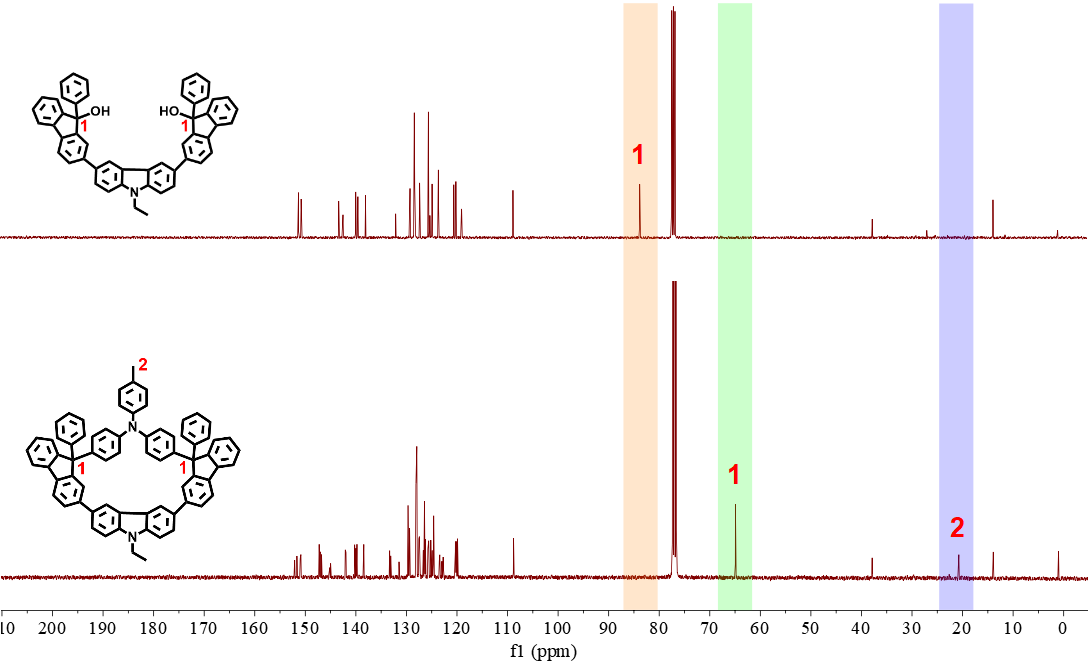


**Supplementary** **Fig. 7 |** 13C{1H} NMR spectra of AOH and AG. A signal appeared at 64.9 ppm corresponding to the 9-position carbons in the fluorenyls of AG, instead of 83.7 ppm observed in the 9-position carbons of fluorenyls in AOH. Furthermore, the detected peak at 20.7 ppm, corresponding to the carbon of methyl group of 4-methyl-*N*,*N*-diphenylaniline, was observed in the spectra of AG. These results further verified the structure of AG.


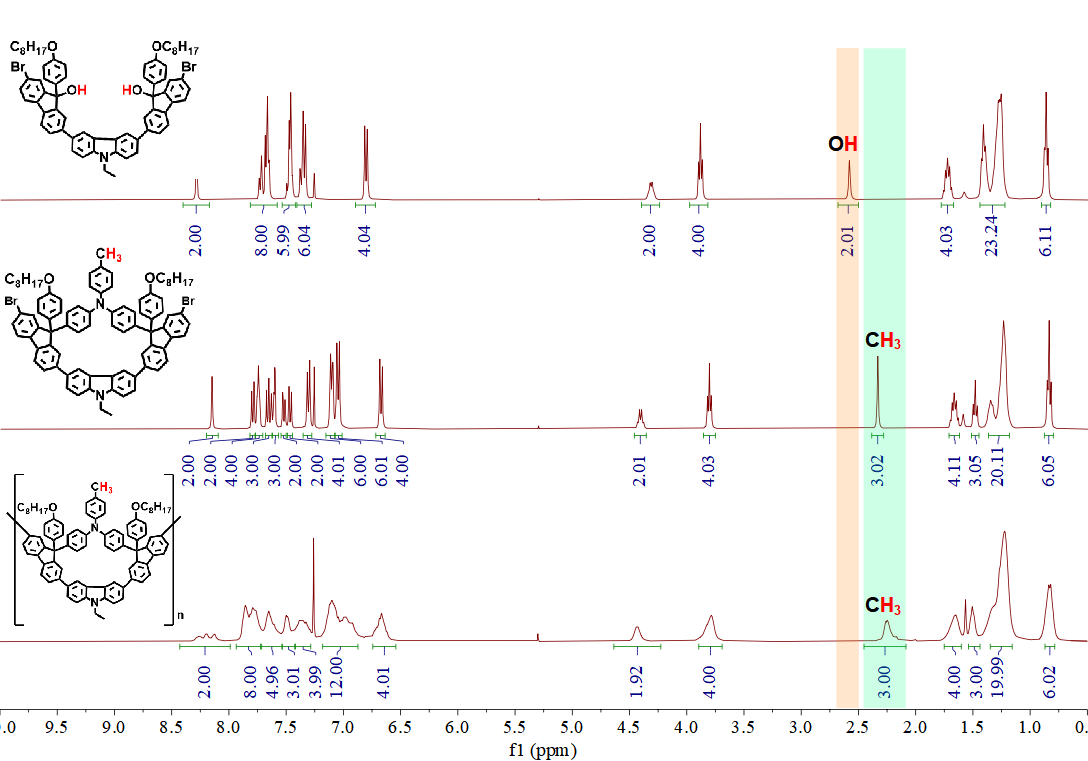


**Supplementary Fig. 8 |** 1H NMR spectra of DBrAOH, DBrAG, and PAG. The proton signal at 2.58 ppm belonging to the protons of hydroxyl groups at the 9-position of DBrAOH was not observed in DBrAG and PAG. The detected peaks at 2.34 and 2.26 ppm, corresponding to the protons of methyl group of 4-methyl-*N*,*N*-diphenylaniline, were observed in the spectra of DBrAG and PAG, respectively. These results indicated the successful synthesis of DBrAG and PAG.


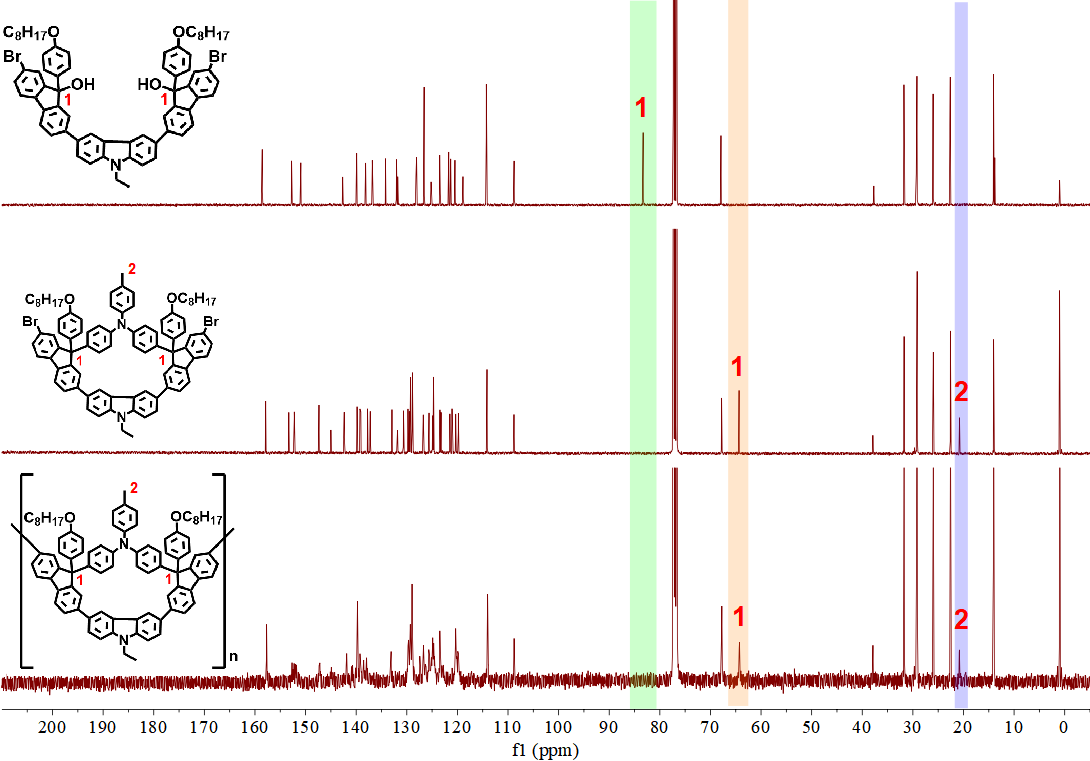


**Supplementary Fig. 9 |** 13C{1H} NMR spectra of DBrAOH, DBrAG, and PAG. The carbon signal appeared at 64.3 ppm corresponding to the 9-position carbons in the fluorenyls of DBrAG and PAG, instead of 83.3 ppm observed in the 9-position carbons of fluorenyls in DBrAOH. Furthermore, the detected peak at 20.8 ppm, corresponding to the carbon of methyl group of 4-methyl-*N*,*N*-diphenylaniline, was observed in the spectra of DBrAG and PAG. The carbon signals at aromatic region (170~100 ppm) were similar to each other for DBrAG and PAG. These results further verified the successful synthesis of DBrAG and PAG.


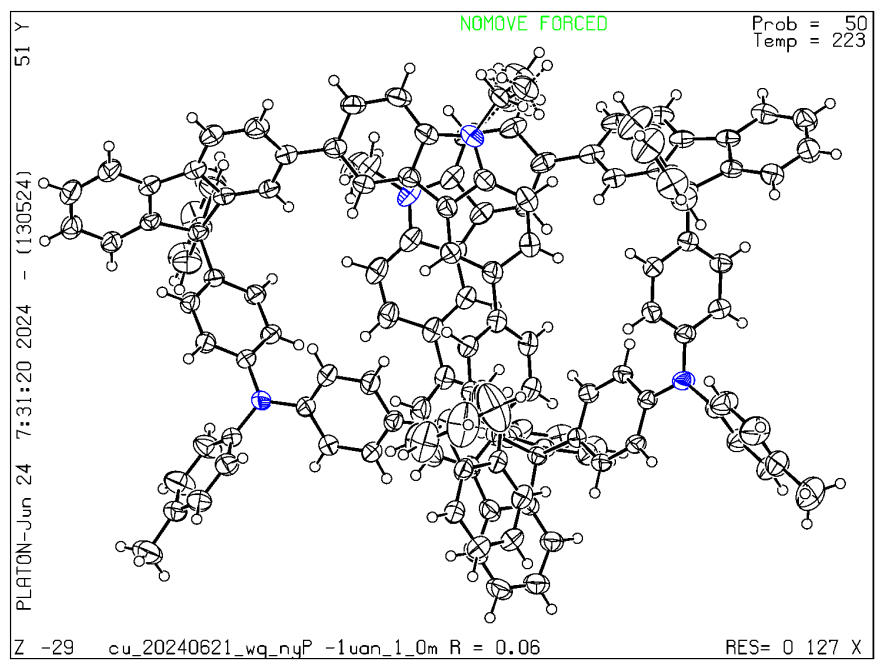


**Supplementary Fig. 10** **|** Thermal ellipsoid plot obtained from crystals of compound AG (displacement ellipsoids are drawn at the 50% probability level). Single crystals suitable for X-ray analysis were obtained by slow evaporation of dichloromethane mixed with ethanol solvent (CCDC No. 2371387).

**Supplementary Table 2** **|** X-ray crystallography data of AG

| Bond precision: C-C = 0.0039 Å Wavelength = 1.54178 |
| --- |
| Cell: a = 12.8165 (2) b = 16.2335 (3) c = 29.0758 (5)  alpha = 86.233 (1) beta = 89.868 (1) gamma = 78.819 (1) |
| Temperature: 223 K |
| Calculated Reported  Volume 5921.44(18) 5921.44(18) |
| Space group P -1 P -1 |
| Hall group -P 1 -P 1 |
| Moiety formula C71H50N2 [+ solvent] C71H50N2 |
| Sum formula: C71H50N2 [+ solvent] C71H50N2 |
| Mr 931.13 931.13 |
| Dx, g cm-3 1.044 1.044 |
| Z 4 4 |
| Mu (mm-1) 0.457 0.457 |
| F000 1960.0 1960.0 |
| F000’ 1965.11 |
| h, k, lmax 15, 19, 35 15, 19, 35 |
| Nref 21884 21712 |
| Tmin, Tmax 0.942, 0.955 0.607, 0.753 |
| Tmin’ 0.942 |
| Correction method = # Reported T Limits: Tmin = 0.607 Tmax = 0.753 |
| AbsCorr = MULTI-SCAN |
| Data completeness = 0.992 Theta (max)= 68.625 |
| R (reflections) = 0.0622 (14658) wR2 (reflections)= 0.1945 (21712) |
| S = 1.065 Npar = 1338 |


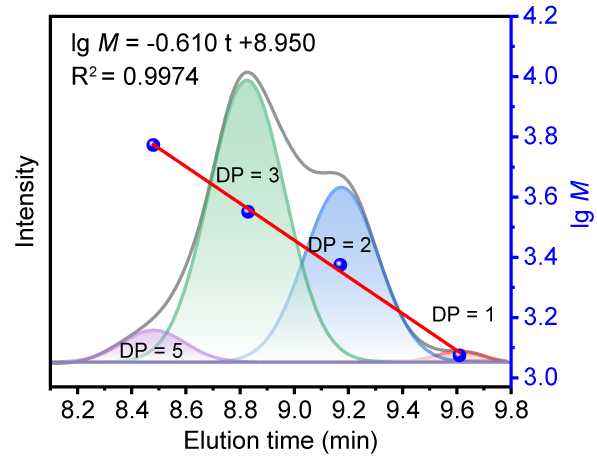


**Supplementary Fig. 11 |** The GPC spectra and calibration curve equation of PAG oligomers.*

* The single-chain properties of the PAG backbone are significantly different from those of polystyrene (PS), prompting us to refit its calibration curve using the PAG oligomers as a reference system (*29*). Considering the large hydrodynamic volume of nanogrid units, distinct GPC peak separation is observed within the oligomers range (Supplementary Fig.11). Therefore, we performed a linear regression using the molecular weights (*M*) of a mixed sample with degrees of polymerization *DP* = 1~5 and their corresponding elution times, both of which are listed in SupplementaryTable 3 The calibration equation is as follows:

lg *M*NP = -0.610 *t* + 8.950 (S2)

The calibration curve equation for polystyrene (PS) is as follows:

lg *M*PS = -0.960 *t* + 12.008 (S3)

The relationship between the calibration curve equation and the Mark-Houwink exponent is as follows:

(S4)

where αNP and αPS are the Mark-Houwink constants for PAG and polystyrene, respectively, and kNP and kPS are the slopes of calibration equations for the formulas S2 and S3, respectively.

By substituting kNP = -0.610, kPS = -0.960, and αPS = 0.714 into S4, the Mark-Houwink exponent of PAG (αNP ) is calculated to be 1.70, indicating that PAG belongs to a rod-like linear framework.

Extend the calibration curve equation of PAG oligomers (S2) to obtain elution times for higher degrees of polymerization (SupplementaryTable 4). Based on elution times corresponding to each degree of polymerization (*DP*), a complete signal peak of the sample was deconvoluted to obtain the proportion *Pi* for each *DP*. The *Pi* satisfy the formula:

(S5)

The calculation of the number-average molecular weight (*M*n, S6) and weight-average molecular weight (*M*w, S7) are as follows:

(S6)

(S7)

**Supplementary Table 3 |** The variation of exact mass of PAG oligomers as a function of elution time.

| *DP* | Elution time (min) | Exact mass (*M*) | lg *M* |
| --- | --- | --- | --- |
| 1 | 9.61 | 1187 | 3.07 |
| 2 | 9.17 | 2371 | 3.37 |
| 3 | 8.83 | 3556 | 3.55 |
| 5 | 8.48 | 5925 | 3.77 |

**Supplementary Table 4 |** The calculation of elution times for *DP* = 6~13.

| *DP* | Exact mass (*M*) | lg *M* | Elution time (min) |
| --- | --- | --- | --- |
| 6 | 7110 | 3.85 | 8.36 |
| 7 | 8294 | 3.92 | 8.25 |
| 8 | 9479 | 3.98 | 8.15 |
| 9 | 10664 | 4.03 | 8.07 |
| 10 | 11848 | 4.07 | 7.99 |
| 11 | 13033 | 4.12 | 7.93 |
| 12 | 14217 | 4.15 | 7.86 |
| 13 | 15402 | 4.19 | 7.81 |


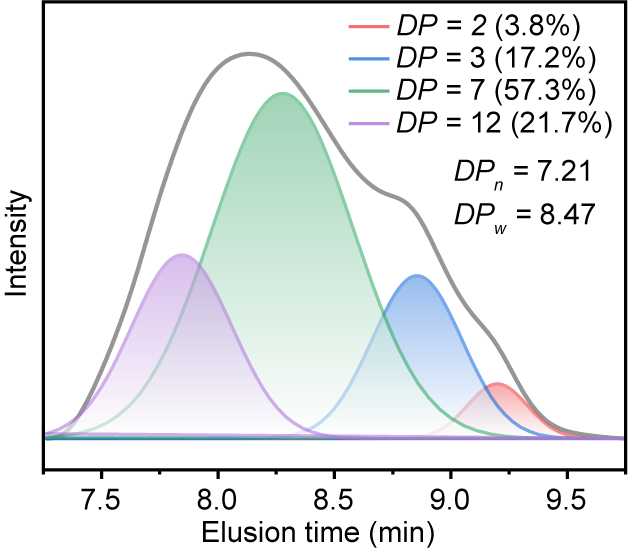


**Supplementary Fig. 12 |** The GPC spectra and molecular weight calculation of PAG. According to the formula S6 and S7, the number-average molecular weight (*M*n) of PAG is calculated to be 8539, with a number-average degree of polymerization (*DP*n)of 7.21. The weight-average molecular weight (*M*w) is calculated to be 10032, with a weight-average degree of polymerization (*DP*w) of 8.47. The polydispersity index is calculated to be 1.17.


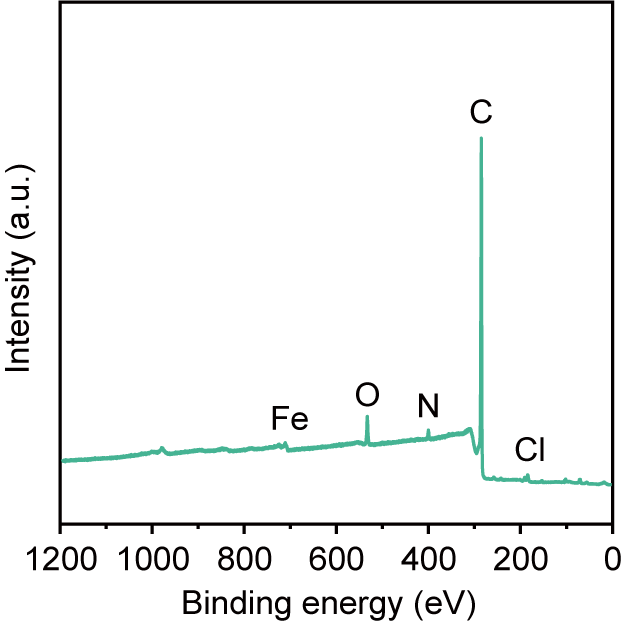


**Supplementary Fig. 13 |** XPS survey for FeAG, oxygen comes from the air.

**Supplementary Table 5 |** EXAFS fitting parameters at the Fe K-edge for various samples (Ѕ02 = 0.80).

| Sample | Shell | *CN*a | *R*(Å)b | *σ*2(Å2)c | Δ*E*0(eV)d | *R* factor |
| --- | --- | --- | --- | --- | --- | --- |
| Fe foil | Fe-Fe1 | 8 | 2.46±0.01 | 0.0048 | 4.5 | 0.006 |
| Fe-Fe2 | 6 | 2.84±0.02 | 0.0048 | 4.5 | 0.006 |
| Fe2O3 | Fe-O | 5.8±0.2 | 1.96±0.01 | 0.0091 | 6.4 | 0.0080 |
| Fe-Fe | 5.6±0.4 | 2.98±0.02 | 0.0082 |
| FeO | Fe-O | 5.8±0.2 | 2.14±0.01 | 0.0042 | 5.8 | 0.006 |
| Fe-Fe | 12±0.1 | 3.02±0.02 | 0.0075 | 9.6 |
| FeAG | Fe-N | 1.2±0.2 | 1.93±0.01 | 0.0098 | 9.7 | 0.009 |
| Fe-C | 2.7±0.1 | 1.95±0.01 | 0.0098 | 9.7 |
| Fe-Cl | 0.8±0.1 | 2.30±0.02 | 0.0098 | 9.7 |

aCN: coordination numbers; bR: bond distance; cσ2: Debye-Waller factors; dΔE0: the inner potential correction; R factor: goodness of fit. Ѕ02 was set to 0.8, according to the experimental EXAFS fit of Fe foil by fixing CN as the known crystallographic value.


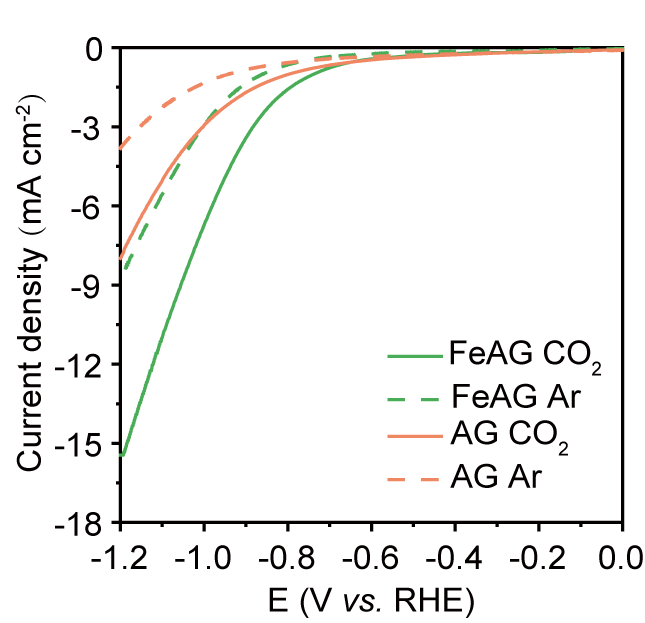


**Supplementary Fig. 14 |** LSV curves for FeAG and AG in CO2 and Ar-saturated 0.5 M KHCO3 electrolyte. LSV displays significantly larger current densities in CO2-saturated electrolyte for AG and FeAG, compared to those in Ar-saturated electrolyte, indicating the enhanced electrocatalytic activity towards CO2RR over hydrogen evolution reactions (HER).


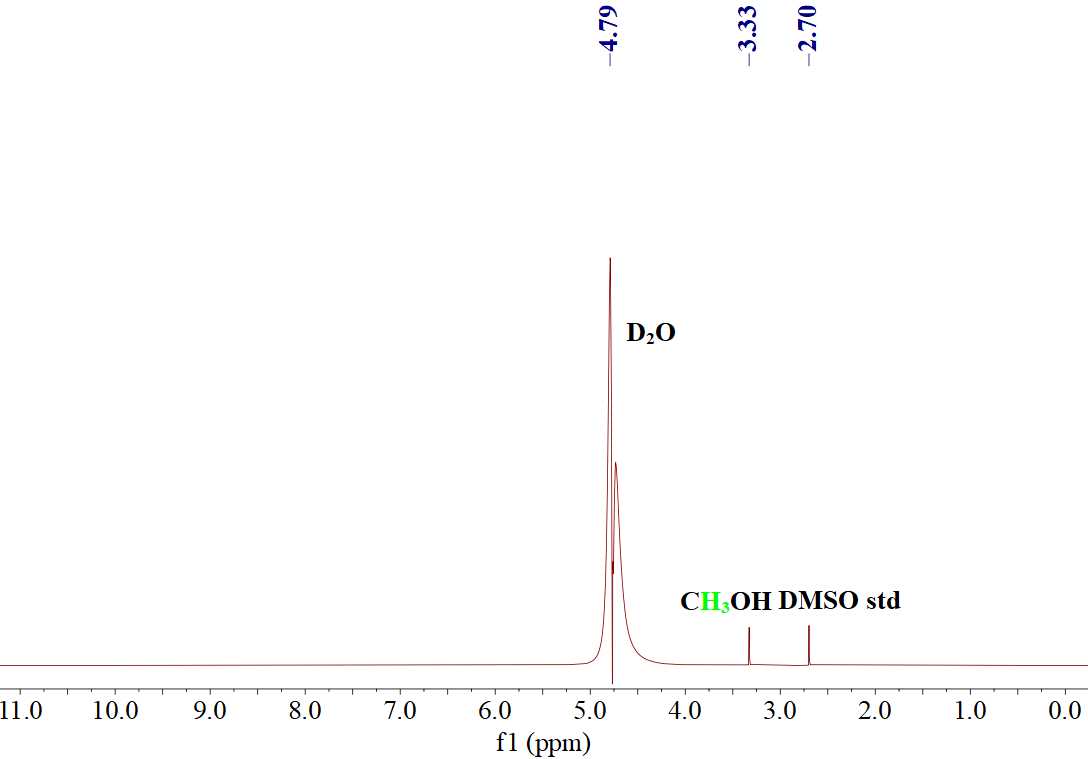


**Supplementary Fig. 15 |** 1H NMR result of the liquid product on FeAG at -0.8 V *vs.* RHE in CO2-saturated 0.5 M KHCO3 electrolyte after 2 h electrolysis with DMSO as the internal standard.


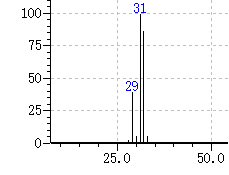


**Supplementary Fig. 16∣**GC-MS spectrum of the electrolyte after 2 h electrolysis at -0.8 V *vs.* RHE in CO2-saturated 0.5 M KHCO3 electrolyte.


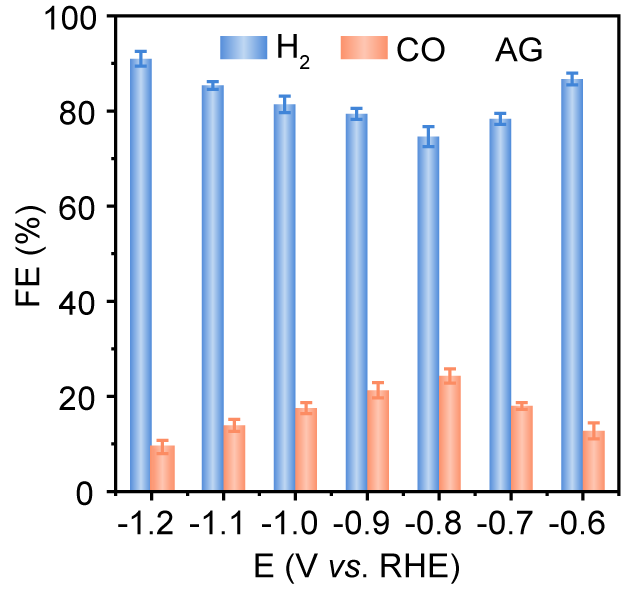


**Supplementary Fig. 17∣**FEs of all products at different potentials on AG in an H-cell with CO2-saturated 0.5 M KHCO3 as electrolyte. CH3OH could not be detected on AG, and CO was the only product from CO2RR with FEs ranging from 9.4% to 24.3%.


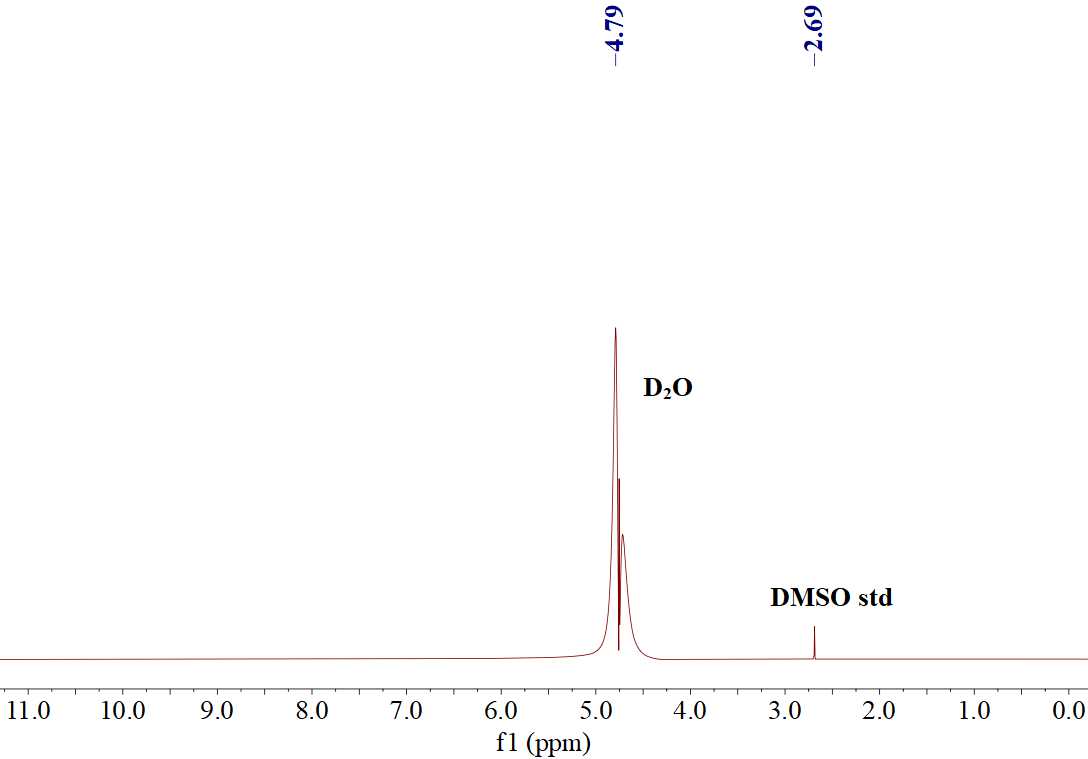


**Supplementary Fig. 18∣**1H NMR results of the liquid product on FeAG at -0.8 V *vs.* RHE in Ar-saturated 0.5 M KHCO3 electrolyte after 2 h electrolysis with DMSO as the internal standard. CH3OH could not be detected, which thereby confirmed that the produced CH3OH indeed originated from reduction of CO2 .


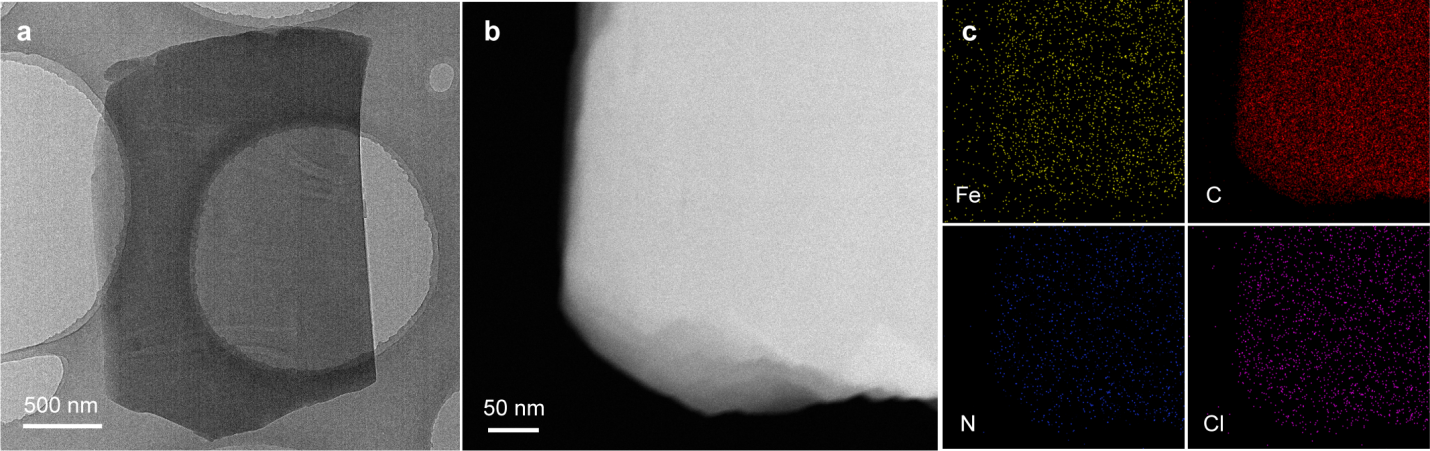


**Supplementary Fig. 19 |** **Morphology characterization of FeAG after duration test.**  **a-c**, TEM image (**a**), HAADF-STEM image (**b**), and EDS mapping images (**c**) for FeAG after 20 h duration test at -0.8 V *vs.* RHE in an H-cell with CO2-saturated 0.5 M KHCO3 as electrolyte. TEM images of FeAG after electrolysis ruled out reductive demetallation of FeAG and formation of Fe or FeOx nanoparticles, confirming the stability of the FeAG catalyst.


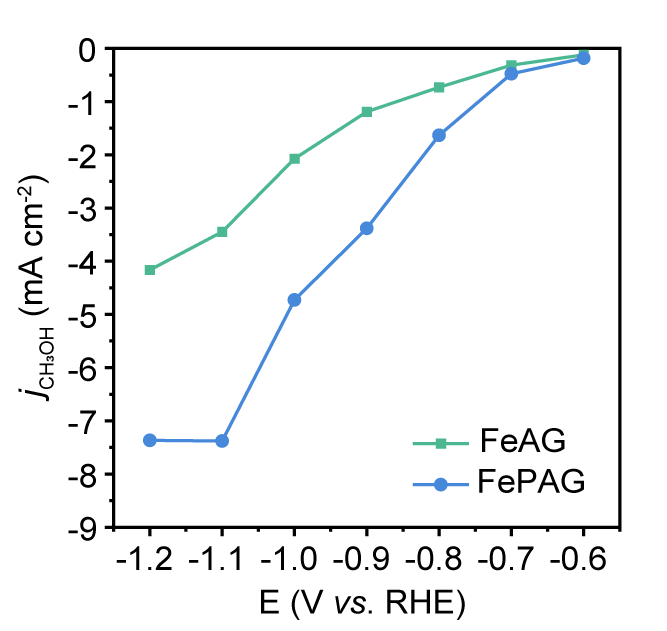


**Supplementary Fig. 20∣**CH3OH partial current density (*j*CH3OH) on FeAG and FePAG at different potentials in an H-cell with CO2-saturated 0.5 M KHCO3 as electrolyte.


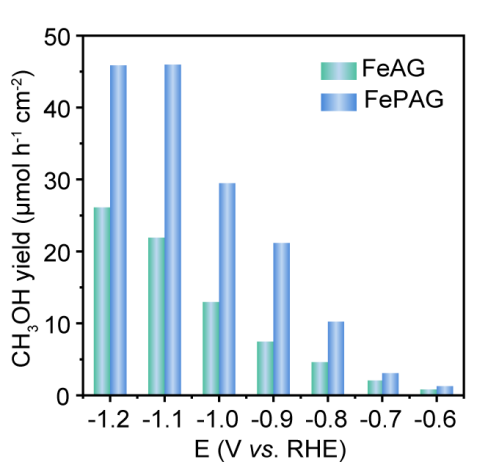


**Supplementary Fig. 21 |** CH3OH yields on FeAG and FePAG at different potentials in an H-cell with CO2-saturated 0.5 M KHCO3 as electrolyte.

.


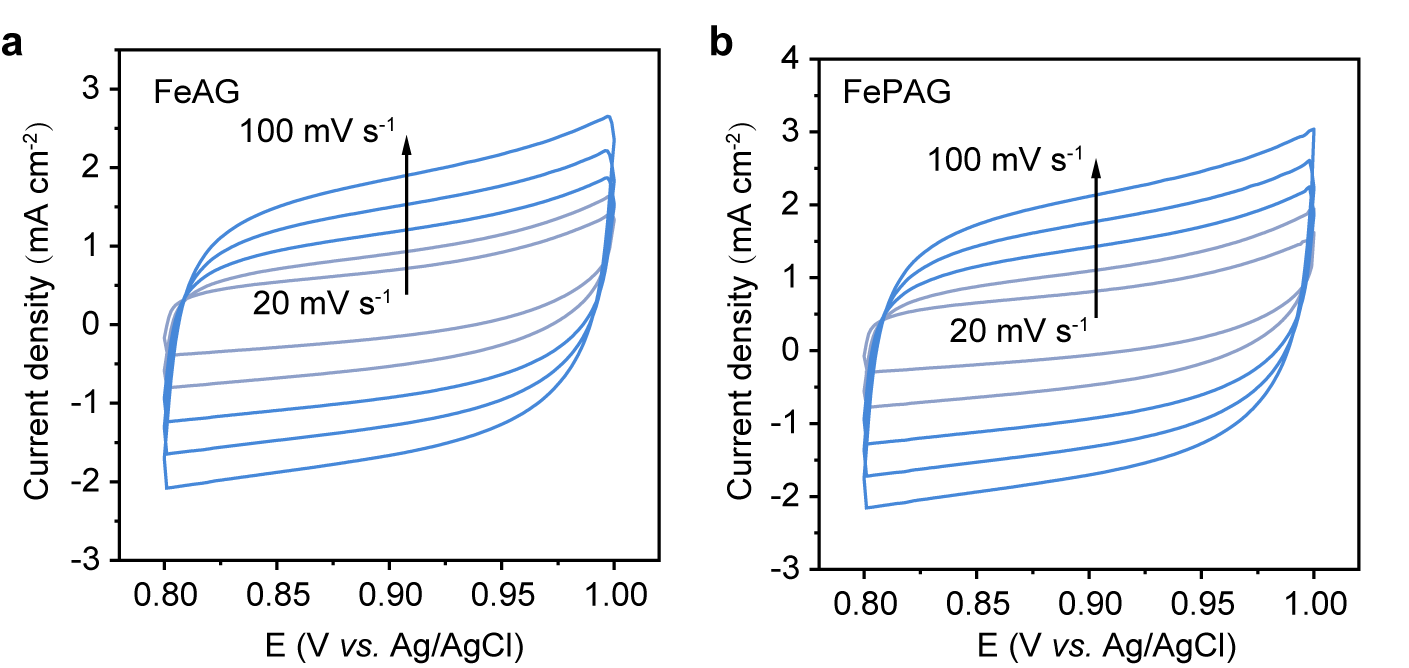


**Supplementary Fig. 22∣Cyclic voltammetry (CV) curves.** **a-b**, CV curves of FeAG (**a**) and FePAG (**b**) at scanning rates of 20, 40, 60, 80, and 100 mV s-1 with Ar-saturated 0.5 M H2SO4 as electrolyte.


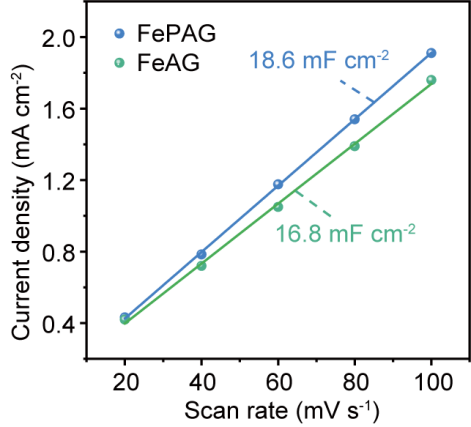


**Supplementary Fig. 23∣**Charging current densities plotted against scan rates for FeAG and FePAG. The FePAG possessed a Cdl of 18.6 mF cm-2, higher than that of FeAG (16.8 mF cm-2), indicating that FePAG has a more abundant electrochemical surface areas and active sites.


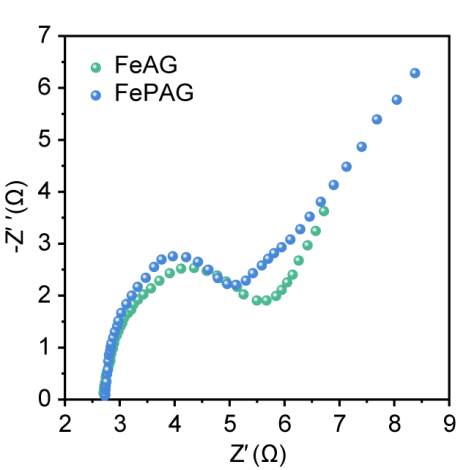


**Supplementary Fig. 24∣**Electrochemical impedance spectroscopy (EIS) of FeAG and FePAG. EIS showed a smaller diameter of the semicircle on FePAG compared to FeAG, indicating faster electron transfer between the FePAG and CO2 molecules.


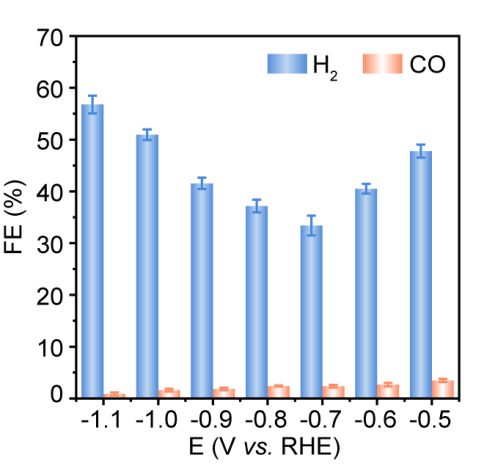


**Supplementary Fig. 25∣**FEs of all gaseous products at different potentials on FePAG in flow cell with 0.1 M KOH + 3 M KCl as electrolyte. CO is the only gaseous product from CO2RR with FE less than 5% in the whole applied potential range.


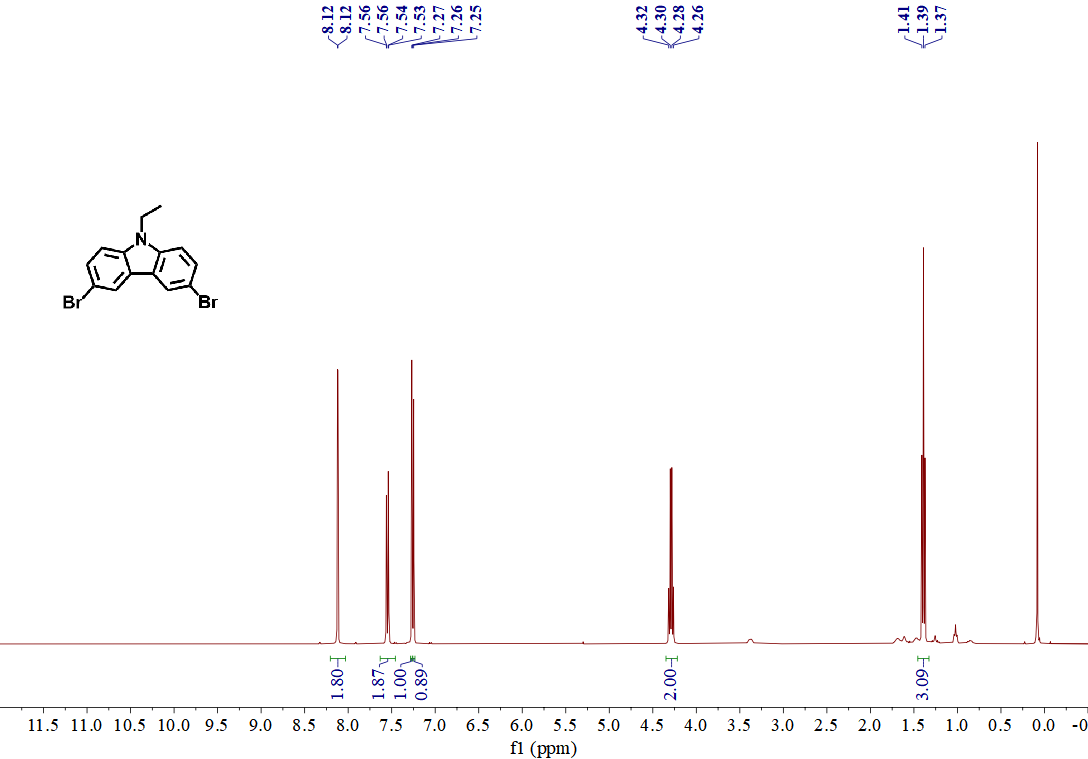


**Supplementary Fig. 26∣**1H NMR spectrum of **1a**.


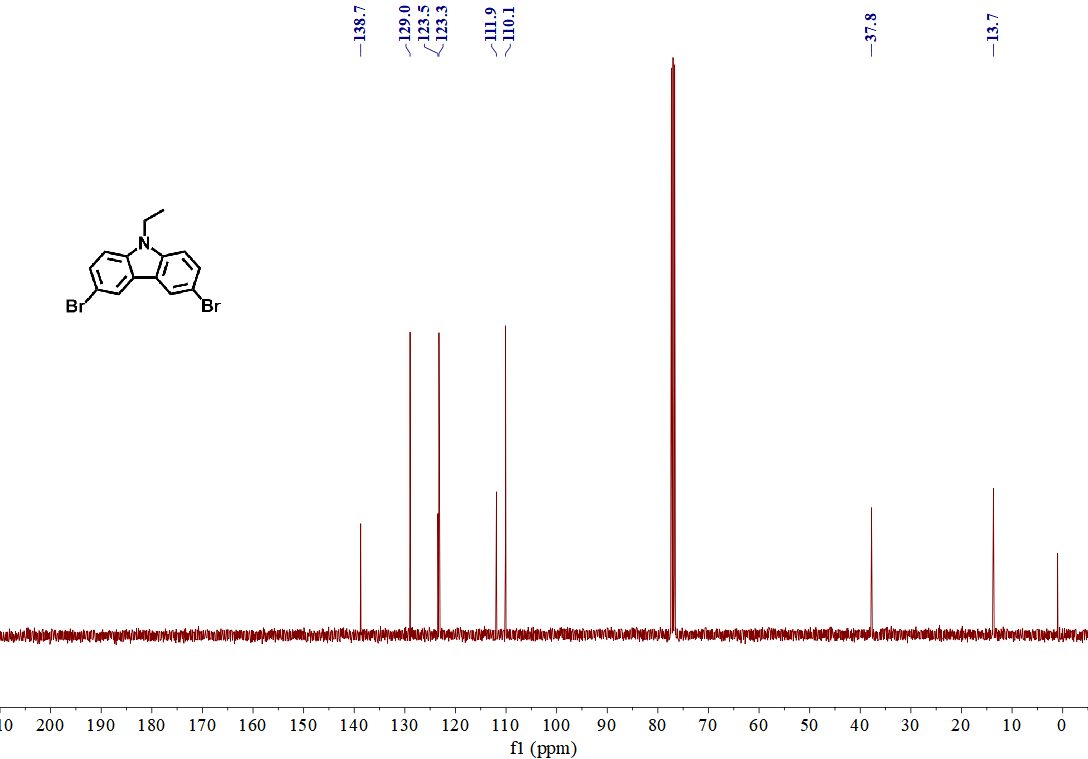


**Supplementary Fig. 27∣**13C{1H} NMR spectrum of **1a**.


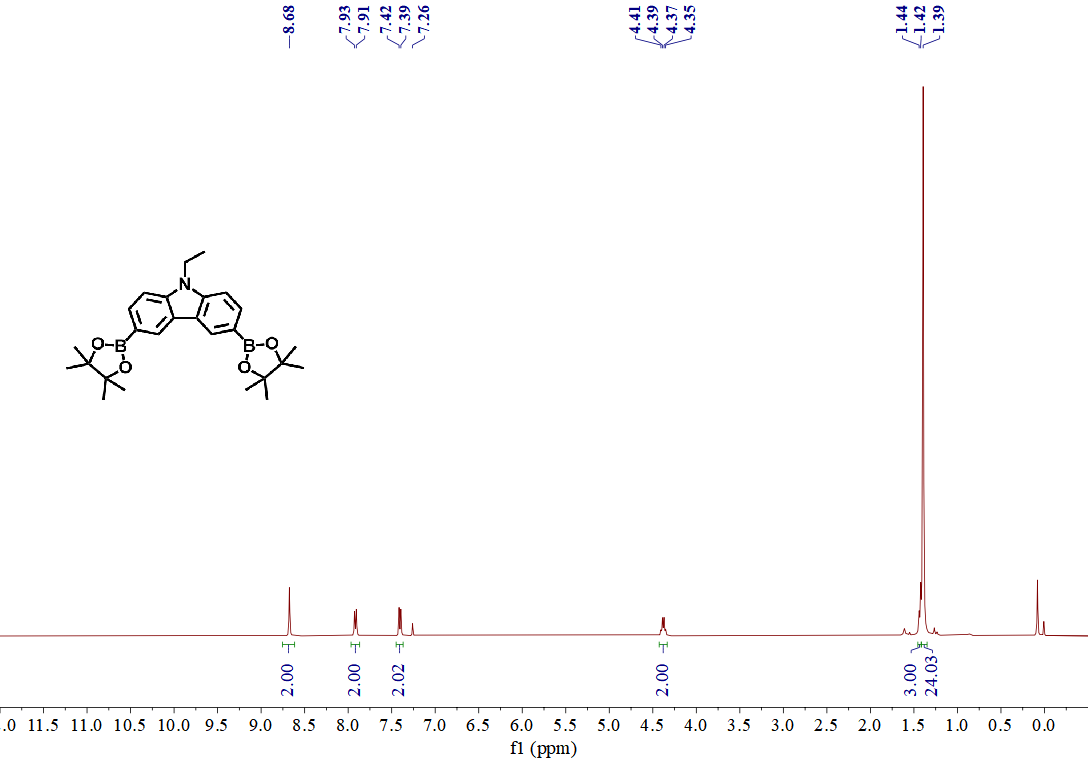


**Supplementary Fig. 28∣**1H NMR spectrum of **2a**.


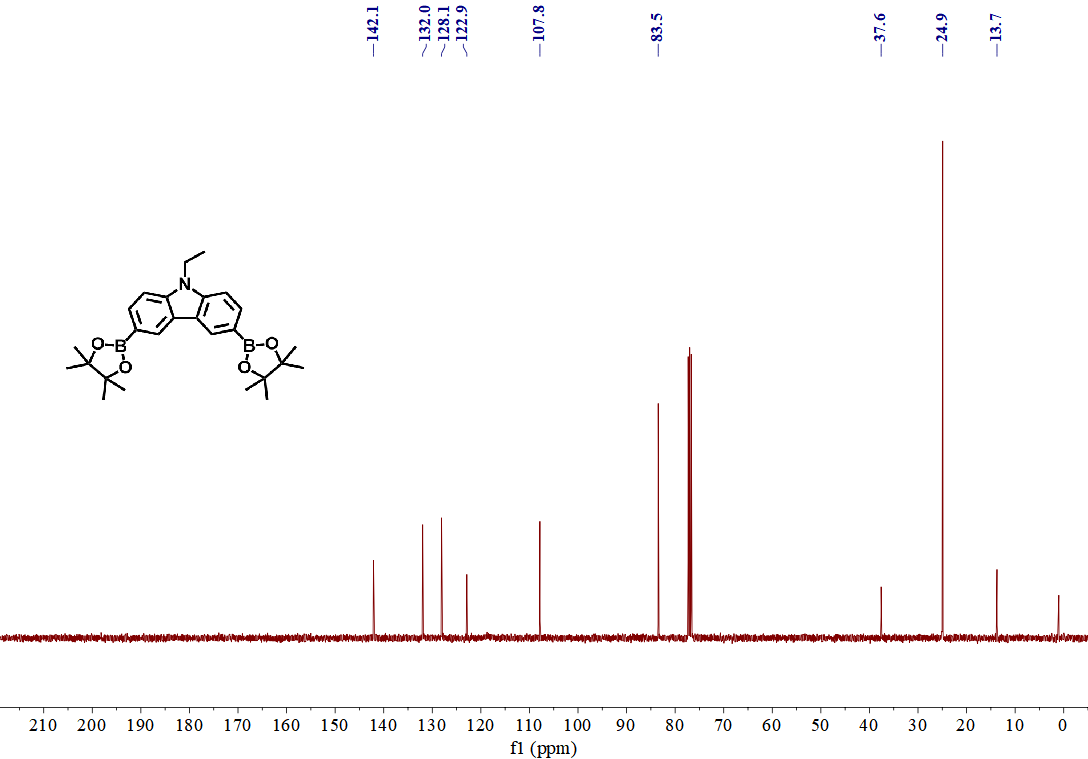


**Supplementary Fig. 29∣**13C{1H} NMR spectrum of **2a**.


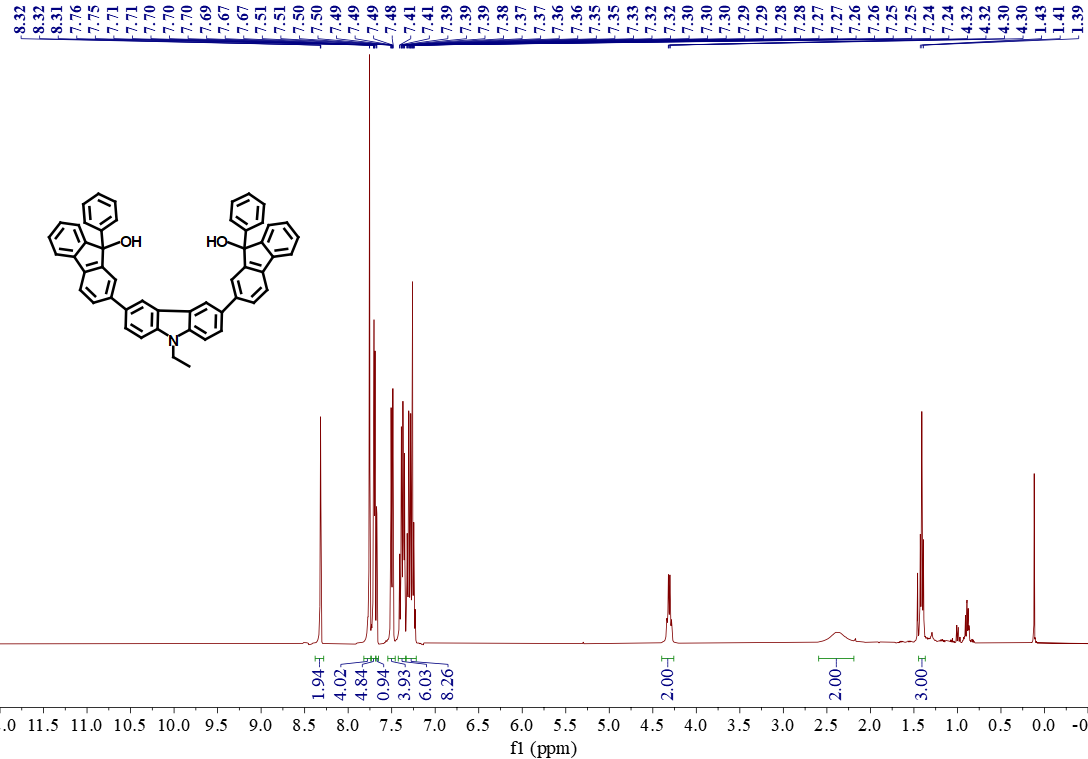


**Supplementary Fig. 30 |** 1H NMR spectrum of AOH.


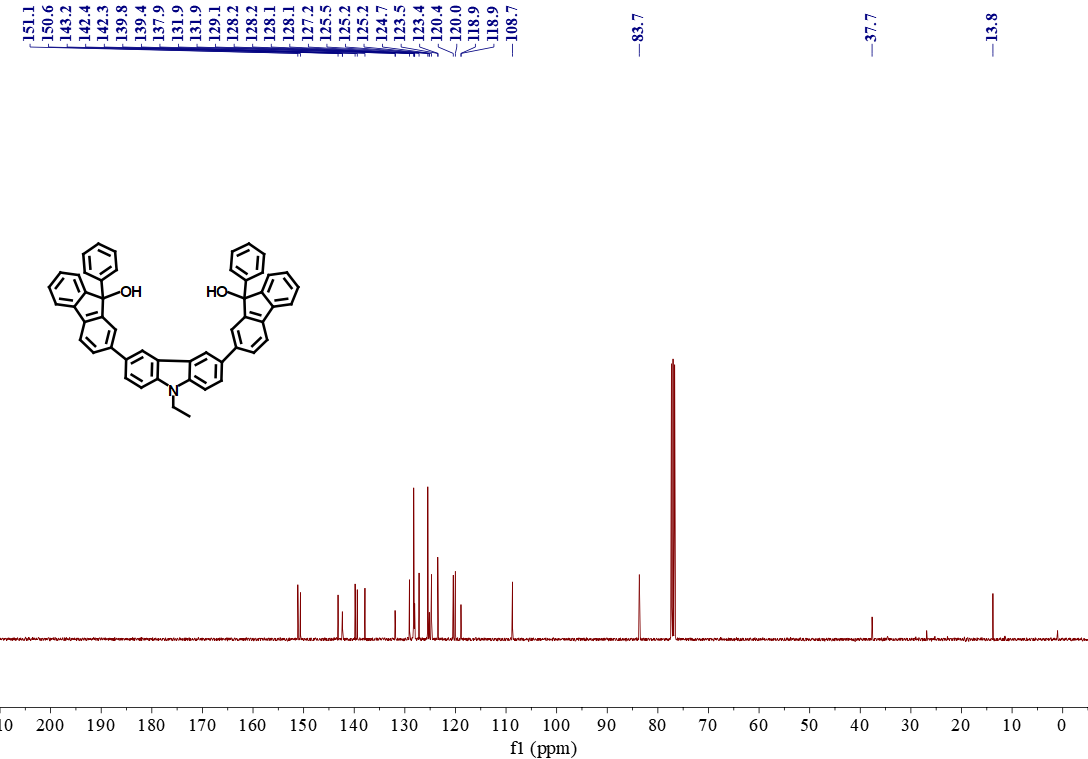


**Supplementary Fig. 31** **|** 13C{1H} NMR spectrum of AOH.


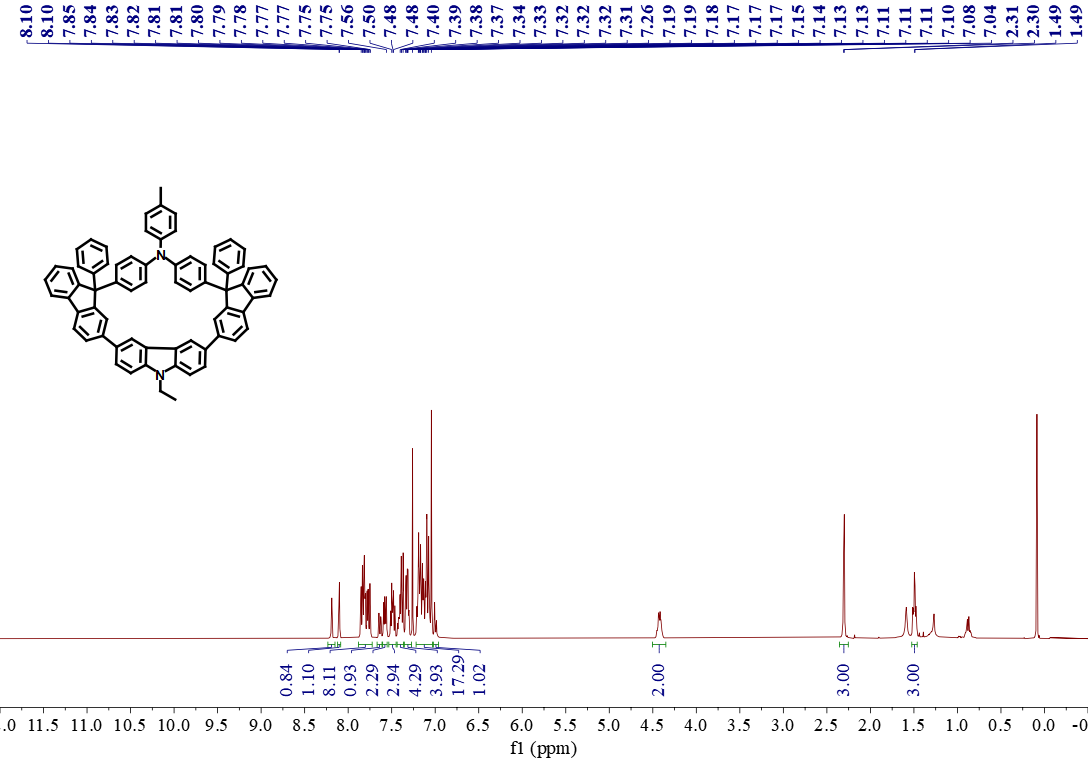


**Supplementary Fig. 32 |** 1H NMR spectrum of AG.


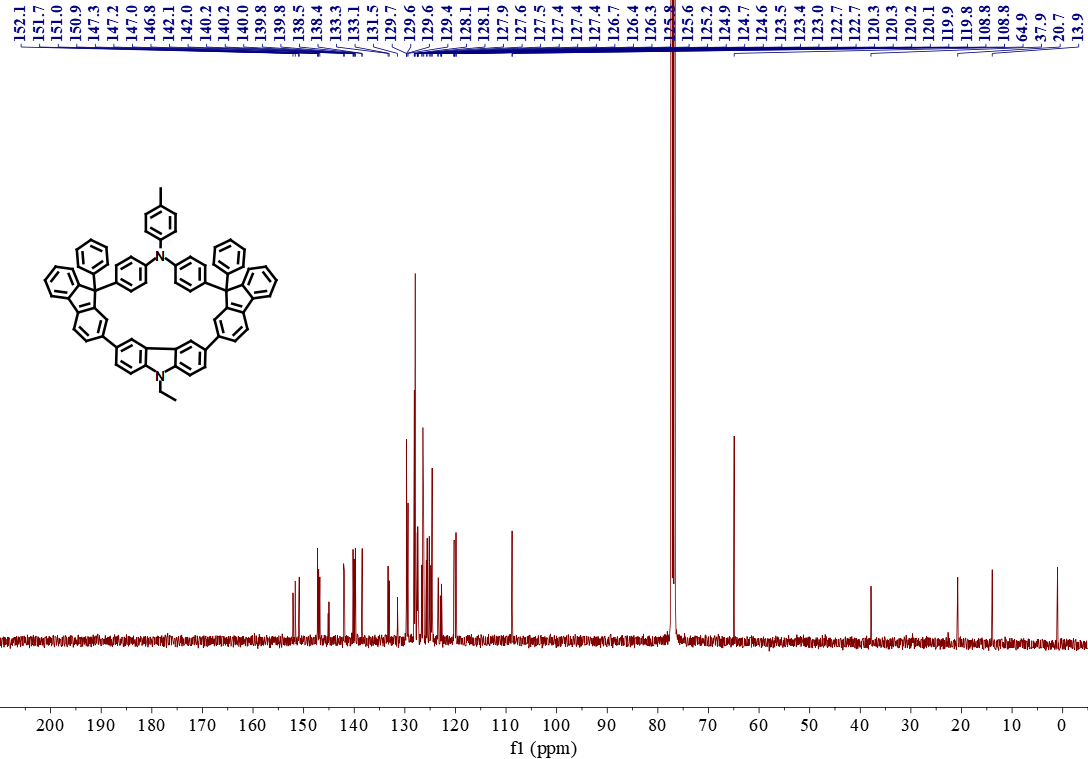


**Supplementary Fig. 33 |** 13C{1H} NMR spectrum of AG.


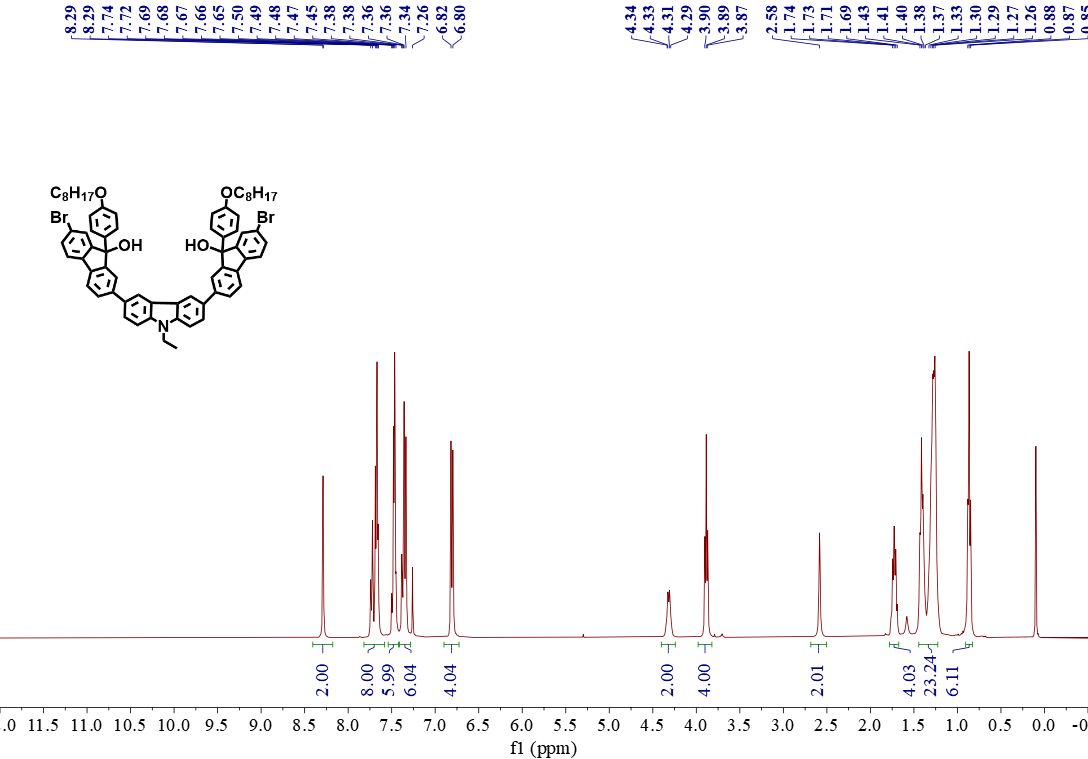


**Supplementary Fig. 34 |** 1H NMR spectrum of DBrAOH.


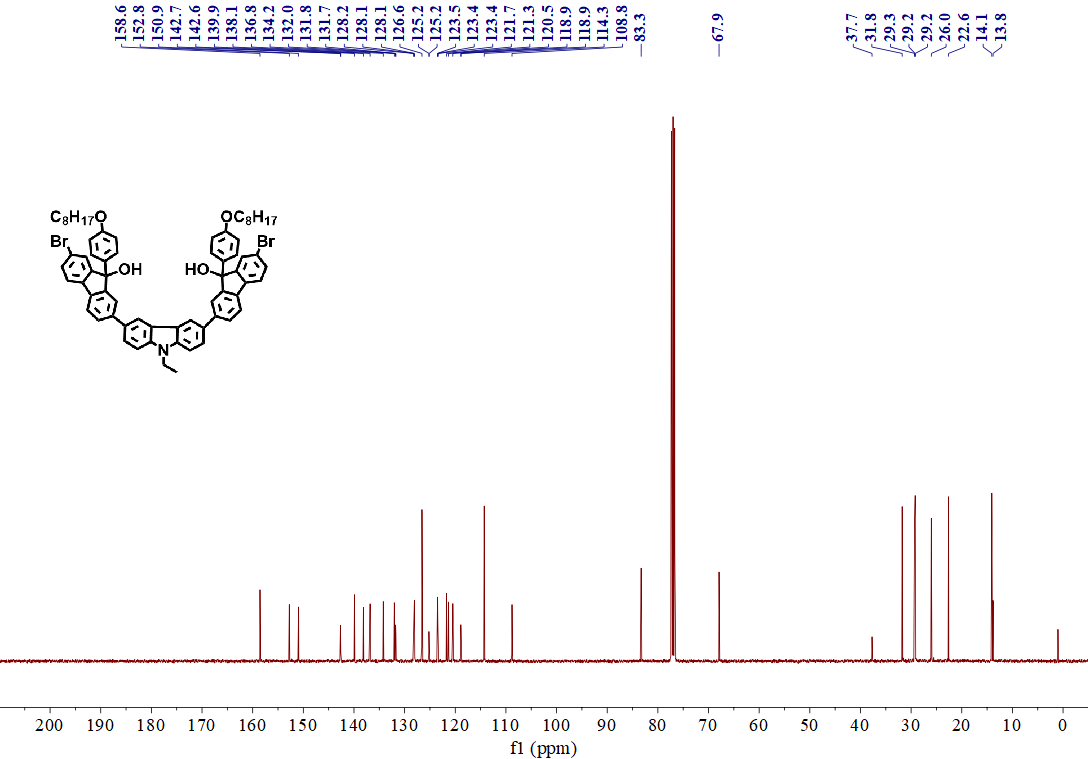


**Supplementary Fig. 35 |** 13C{1H} NMR spectrum of DBrAOH.


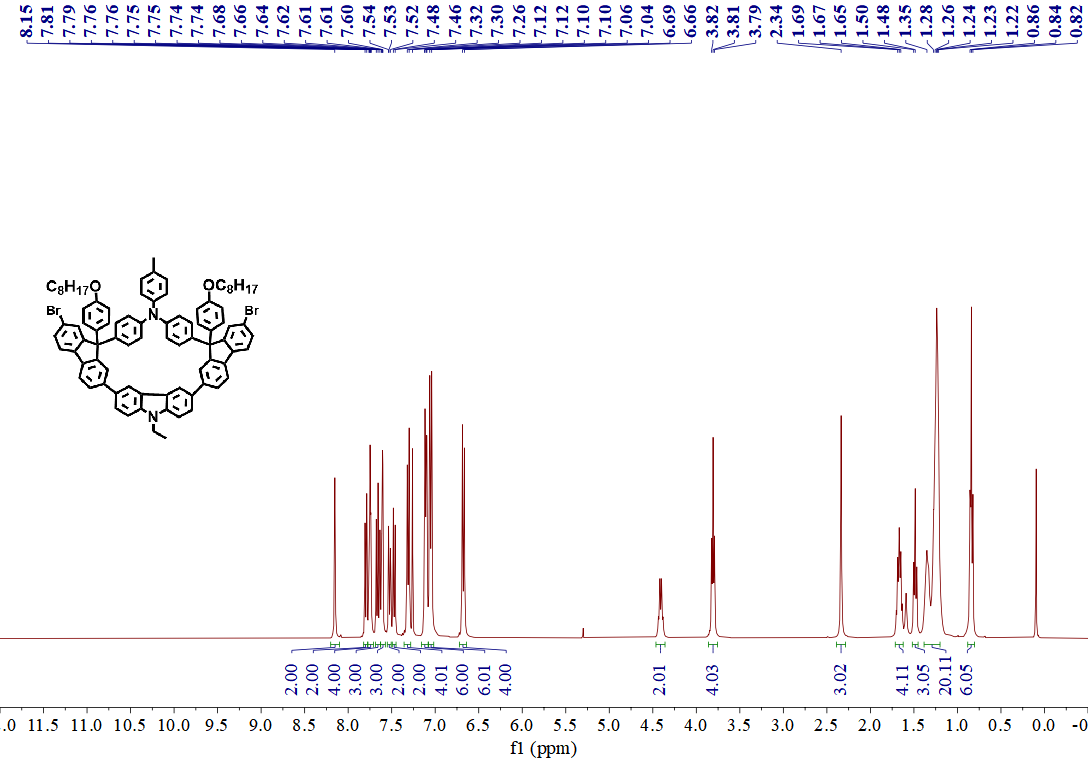


**Supplementary Fig. 36 |** 1H NMR spectrum of DBrAG.


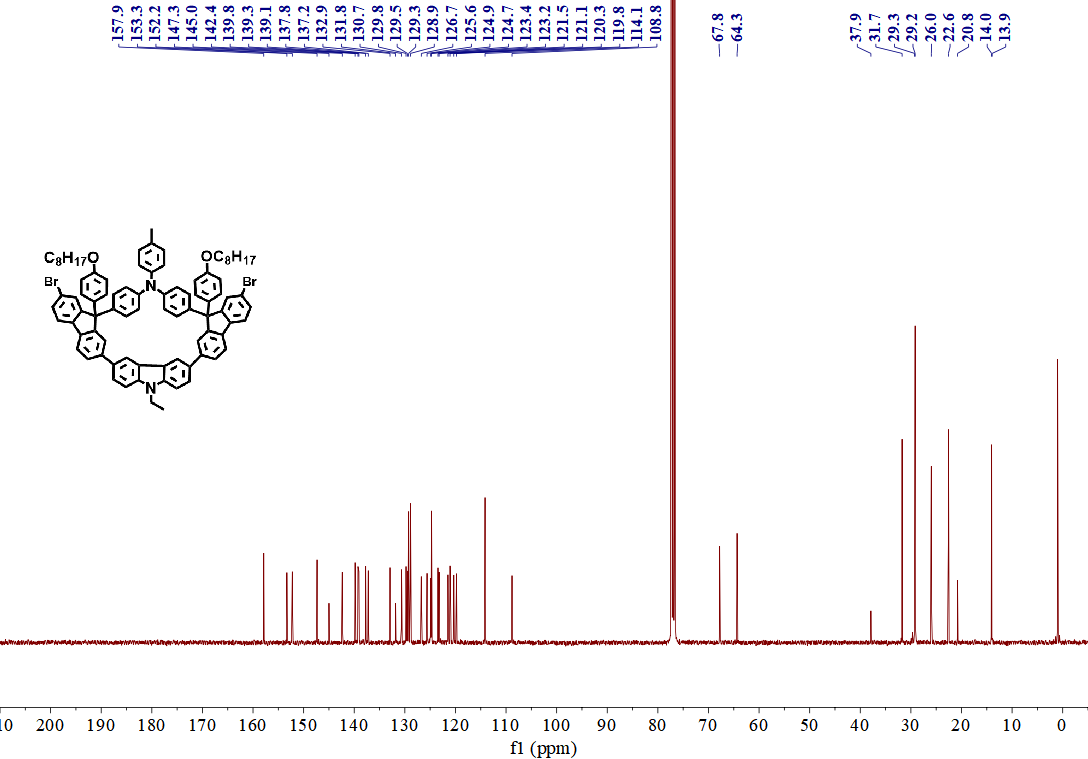


**Supplementary Fig. 37 |** 13C{1H} NMR spectrum of DBrAG.


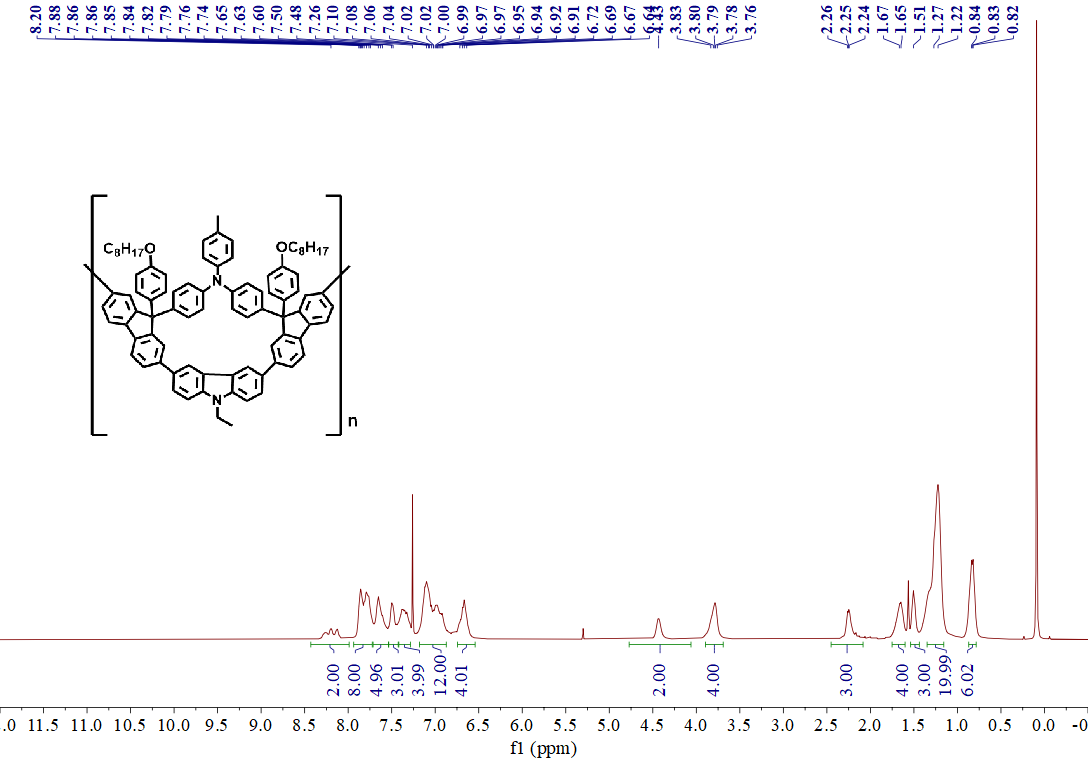


**Supplementary Fig. 38 |** 1H NMR spectrum of PAG.


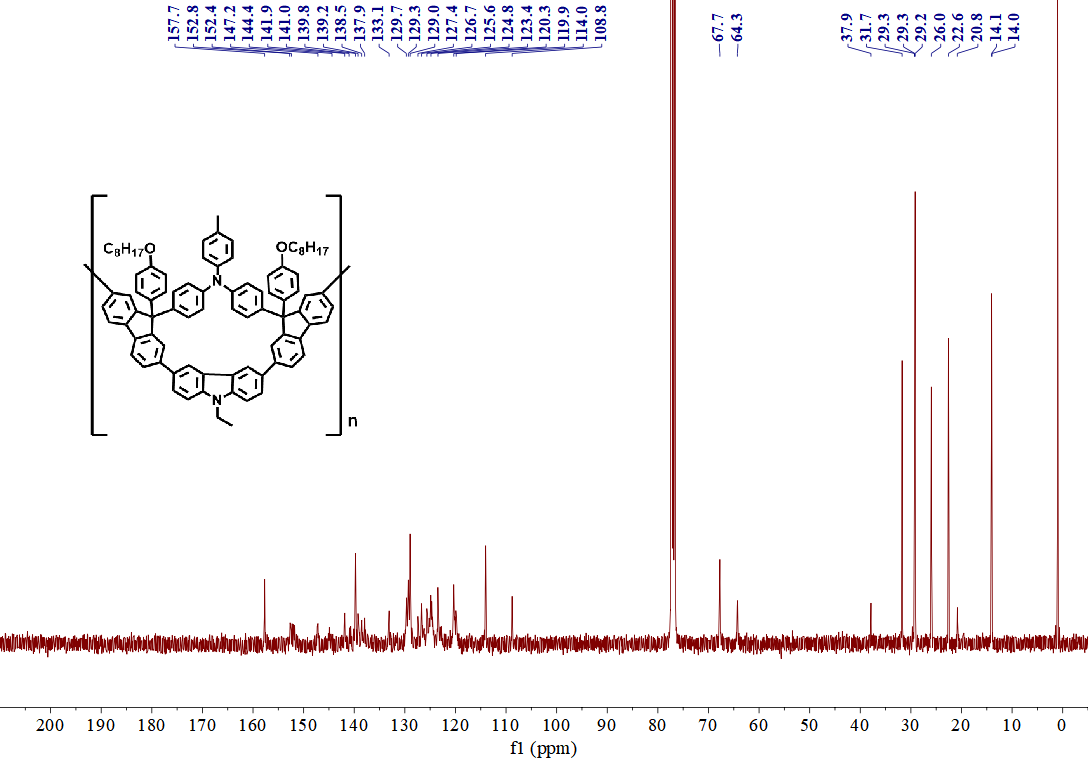


**Supplementary Fig. 39** **|** 13C{1H} NMR spectrum of PAG.

References

1. Wang, S. S. et al. Supramolecular non-helical one-dimensional channels and microtubes assembled from enantiomers of difluorenol. *Angew. Chem. Int. Ed.* **60**, 3979-3983 (2021).
2. Feng, Q. et al. A robust and soluble nanopolymer based on molecular grid-based nanomonomer. *Chinese J. of Polym. Sci.* **35**, 87-97 (2017).
3. Wu, Y., Jiang, Z., Lu, X., Liang, Y., Wang, H. Domino electroreduction of CO2 to methanol on a molecular catalyst. *Nature* **575**, 639-642 (2019).
4. Boutin, E. et al*.* Aqueous electrochemical reduction of carbon dioxide and carbon monoxide into methanol with cobalt phthalocyanine. *Angew. Chem. Int. Ed.* **58**, 16172-16176 (2019).
5. Gonglach, S. et al. Molecular cobalt corrole complex for the heterogeneous electrocatalytic reduction of carbon dioxide. *Nat. Commun.* **10**, 3864 (2019).
6. Su, J. et al*.* Strain enhances the activity of molecular electrocatalysts *via* carbon nanotube supports. *Nat. Catal.* **6**, 818-828 (2023).
7. Song, Y. et al*.* Ultrathin, cationic covalent organic nanosheets for enhanced CO2 electroreduction to methanol. *Adv. Mater.* **36**, 2310037 (2024).
